# Supplementary material
Source: Research Square preprint supplement (doi:10.21203/rs.3.rs-9629444/v1)

# Fig.1

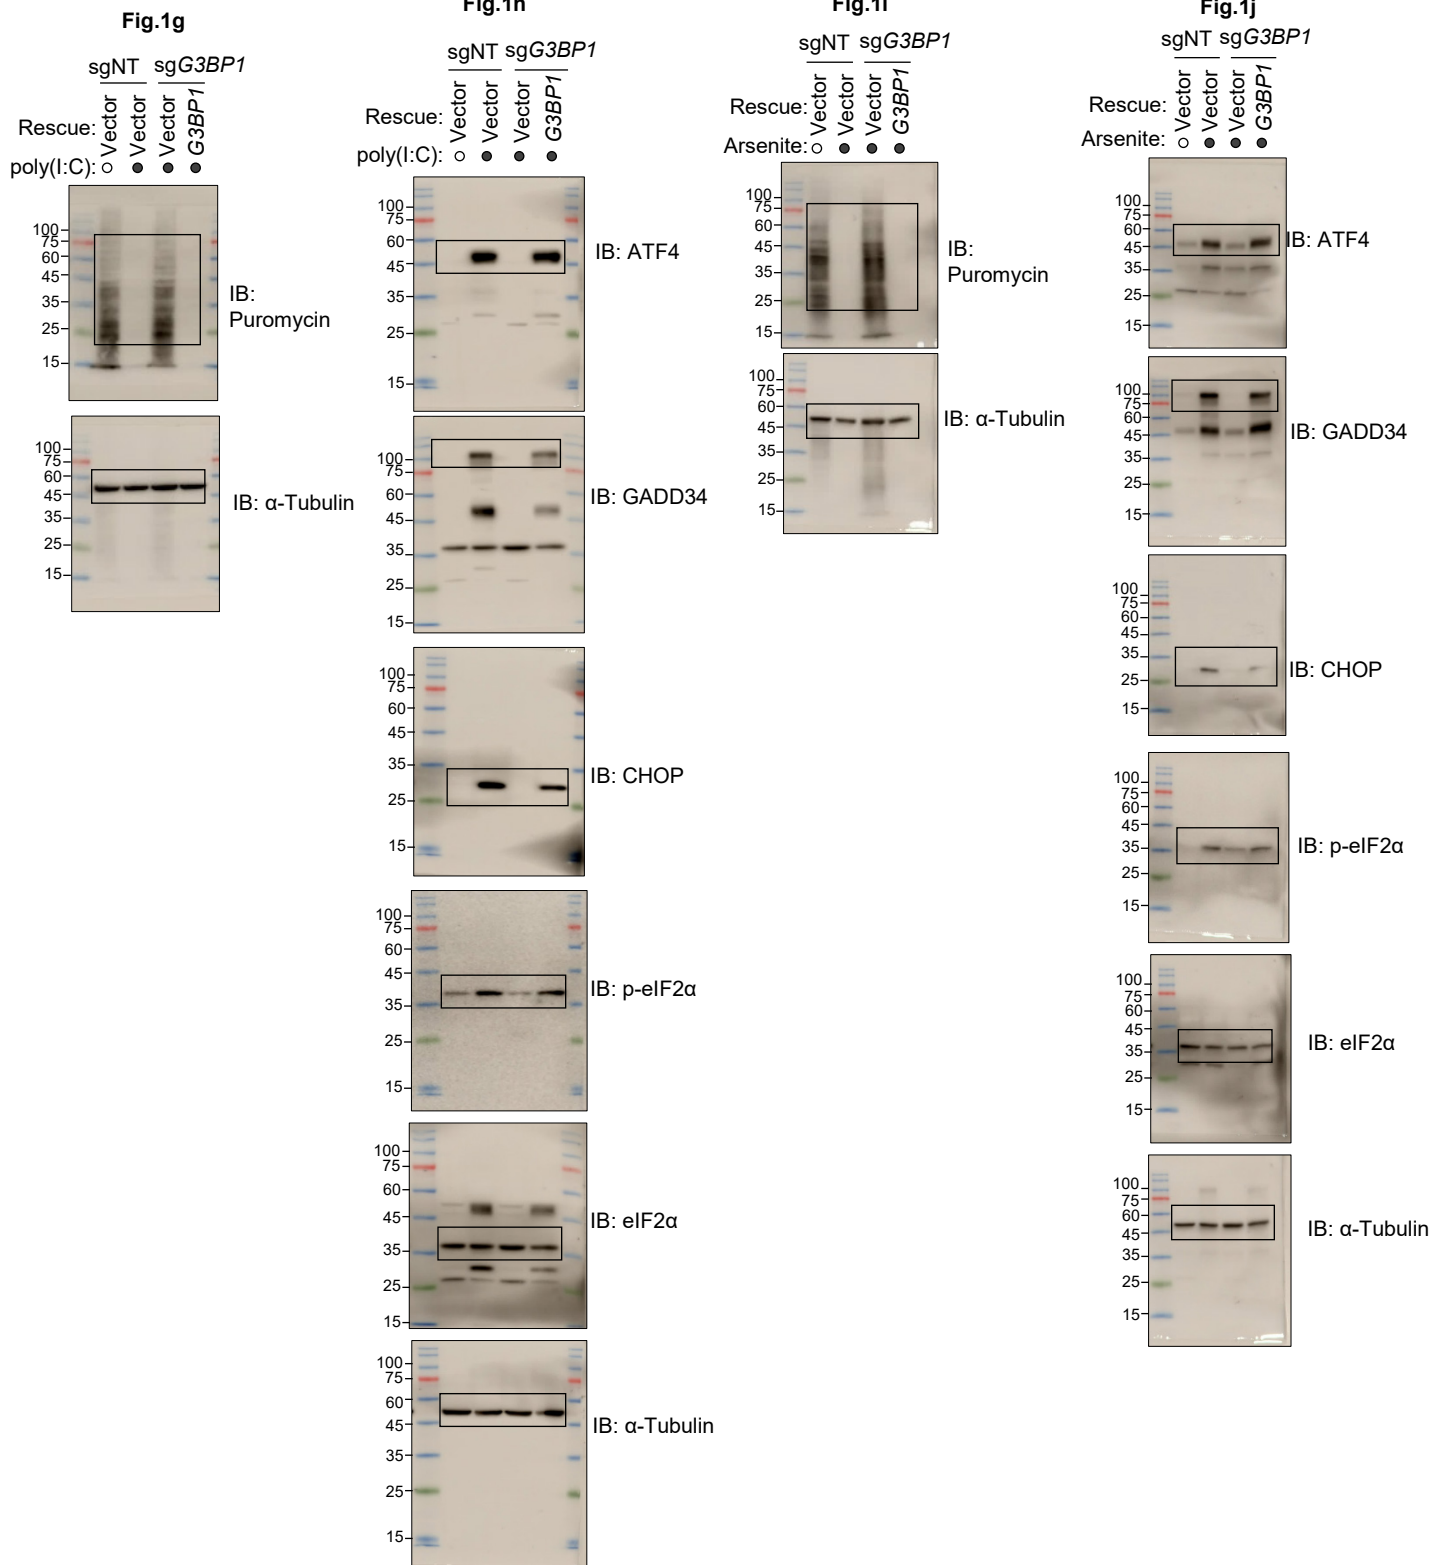

# Fig.1

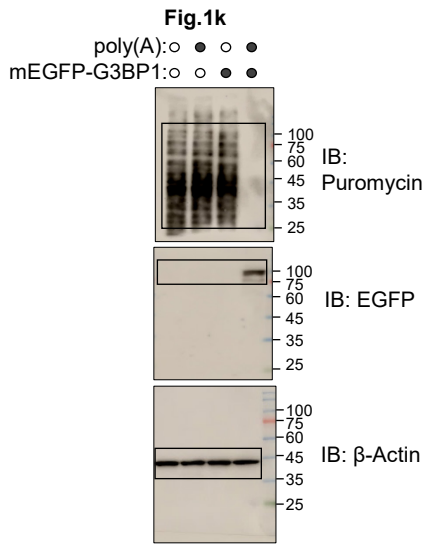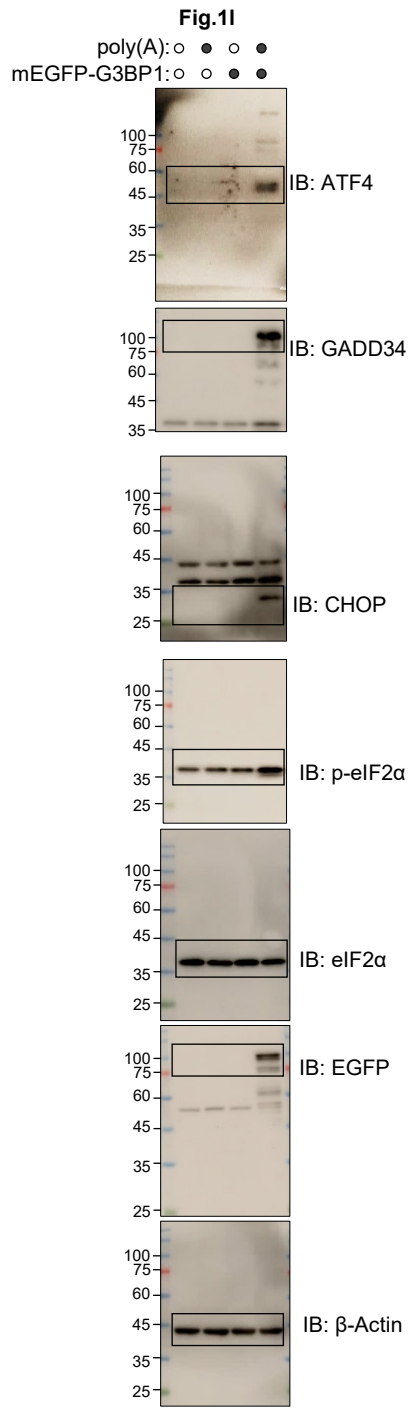

**Fig.2****Fig.2b**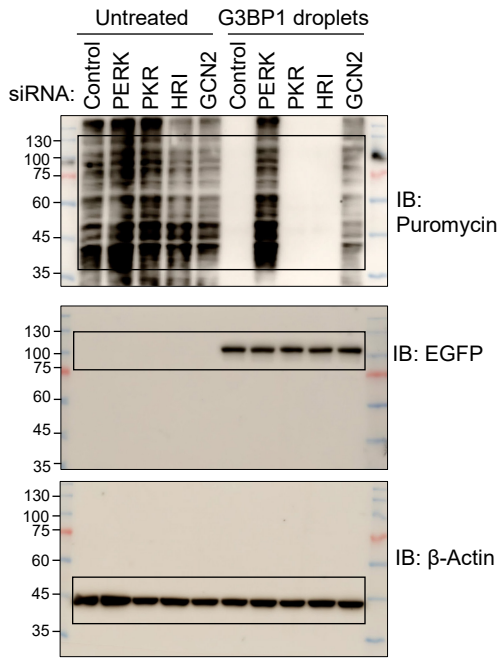**Fig.2c**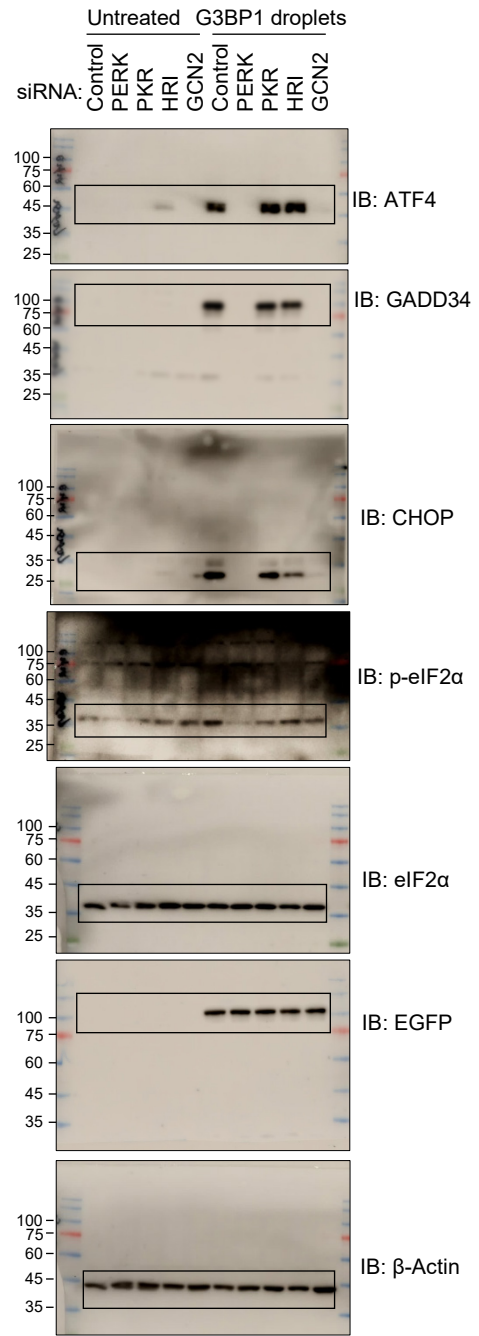**Fig.2d**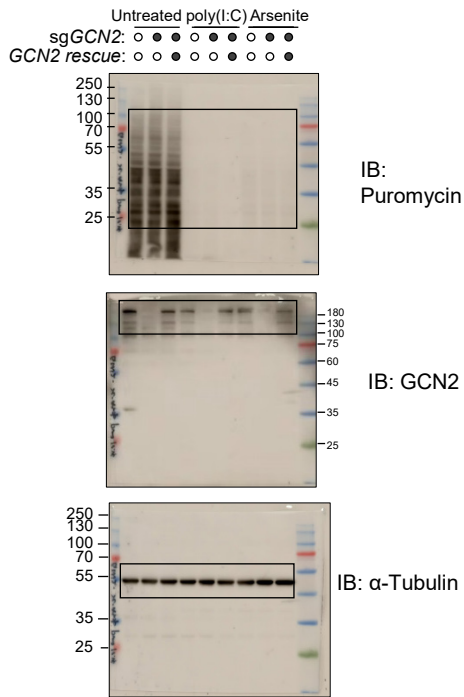

**Fig.2**

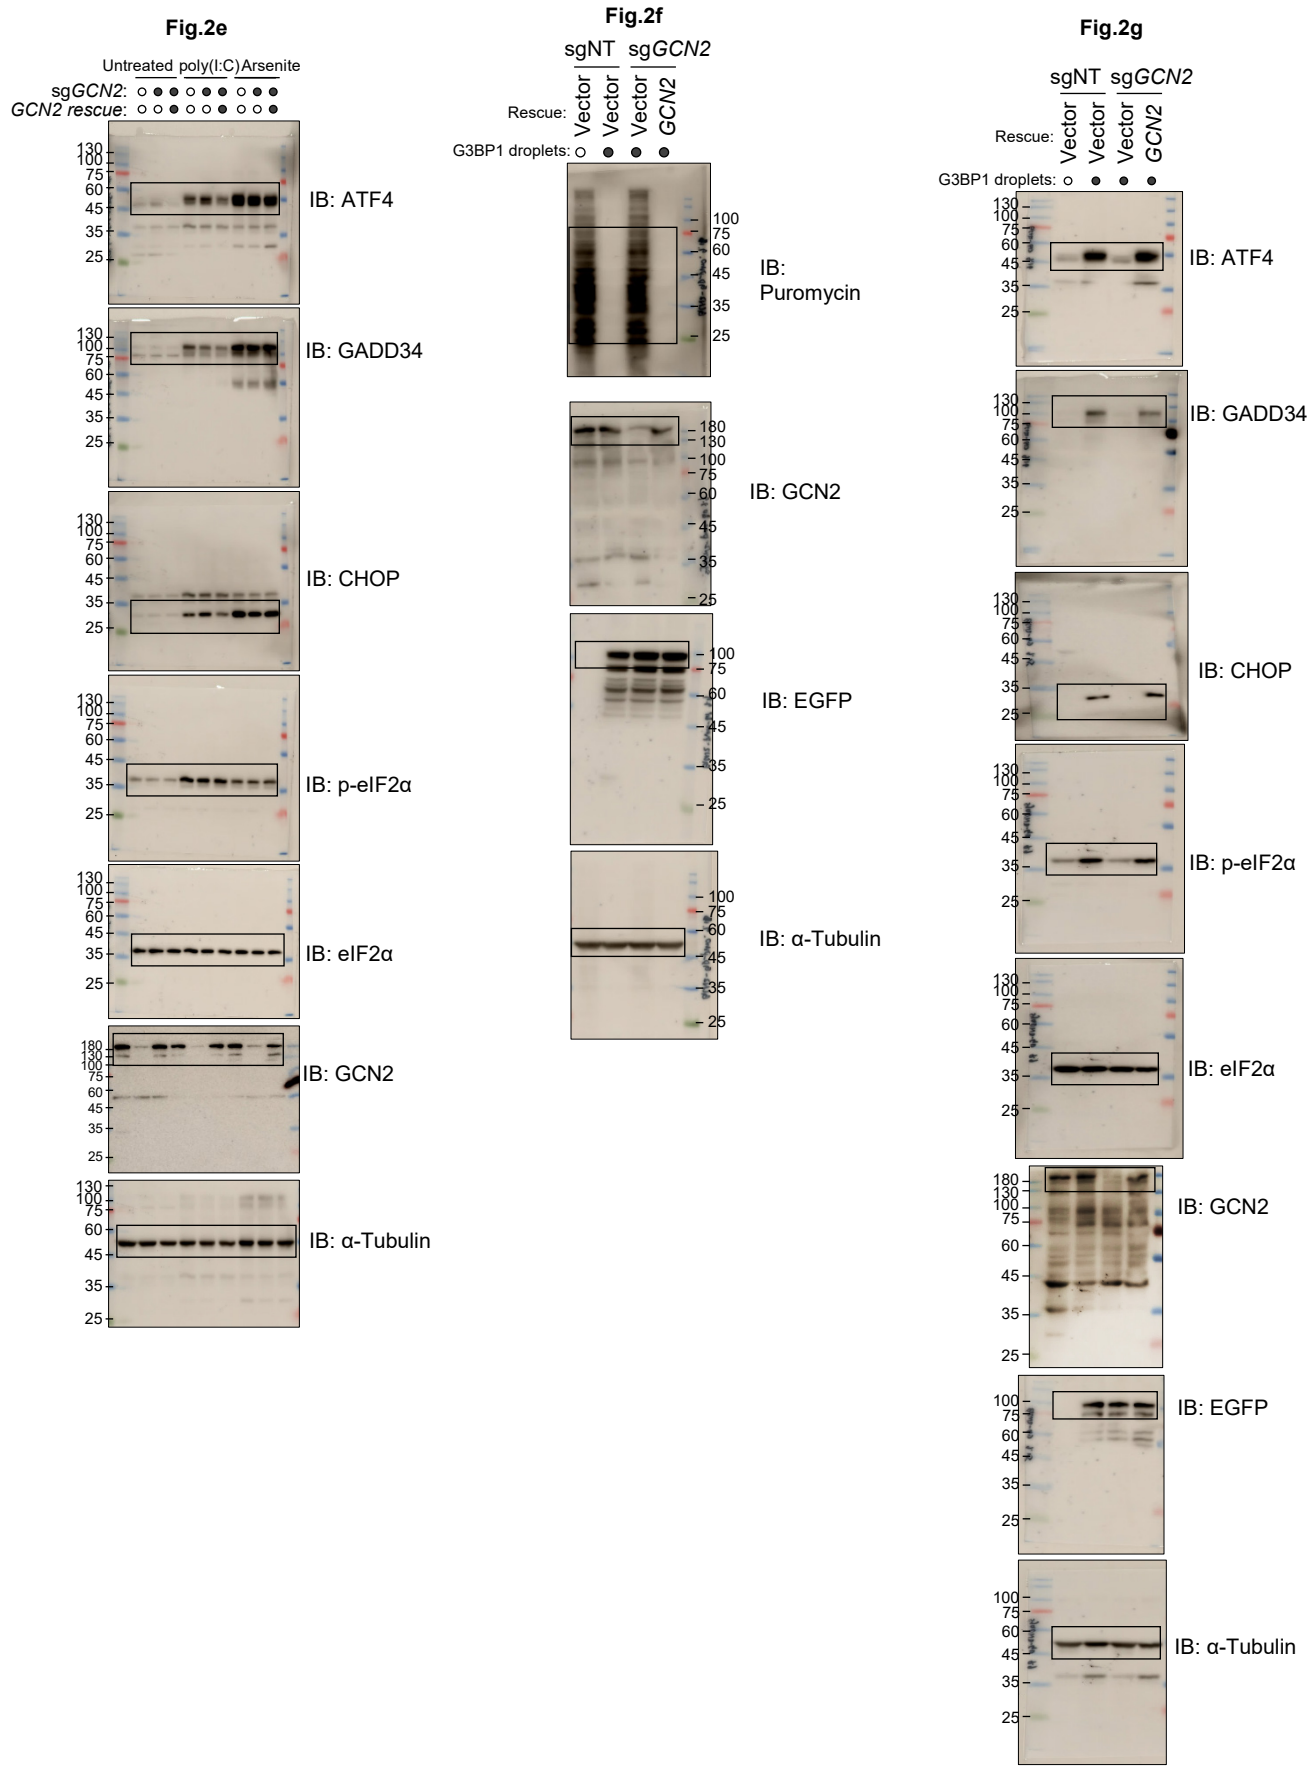

**Fig.2**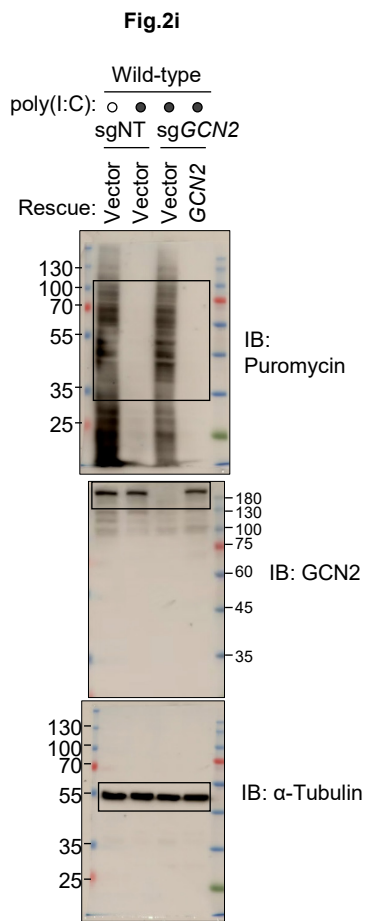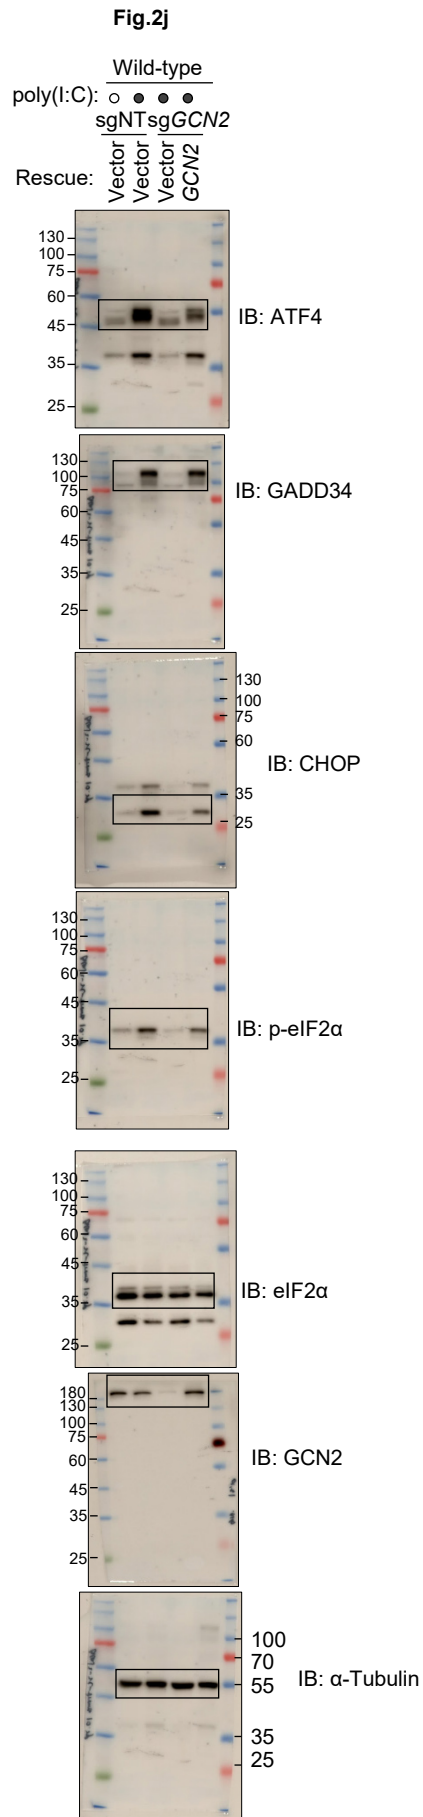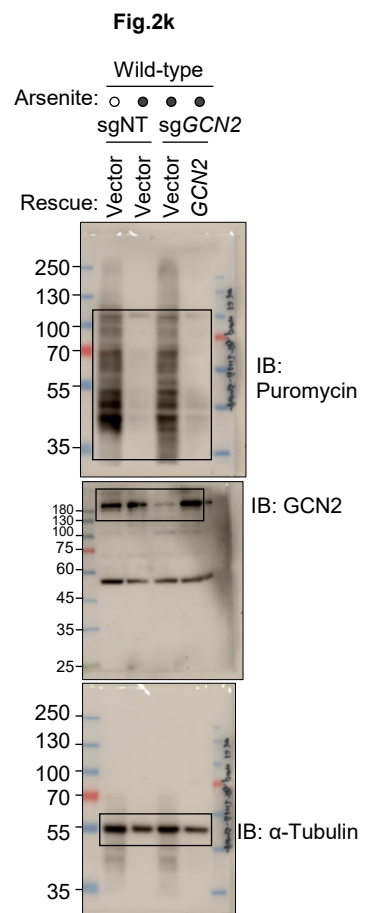

**Fig.2**

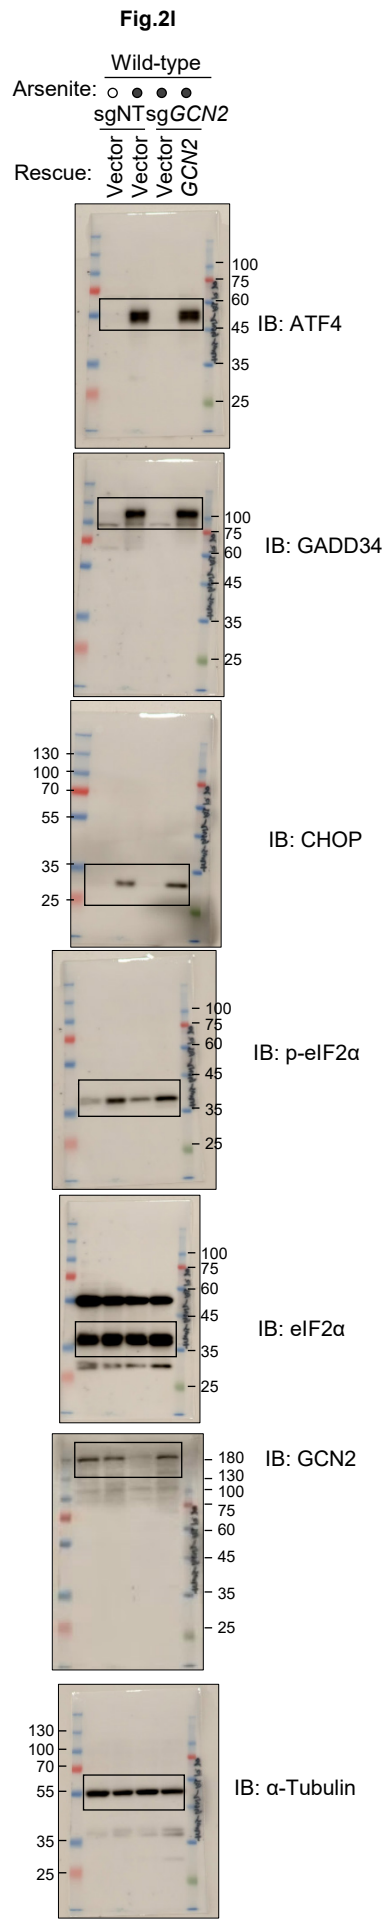

**Fig.3****Fig.3a**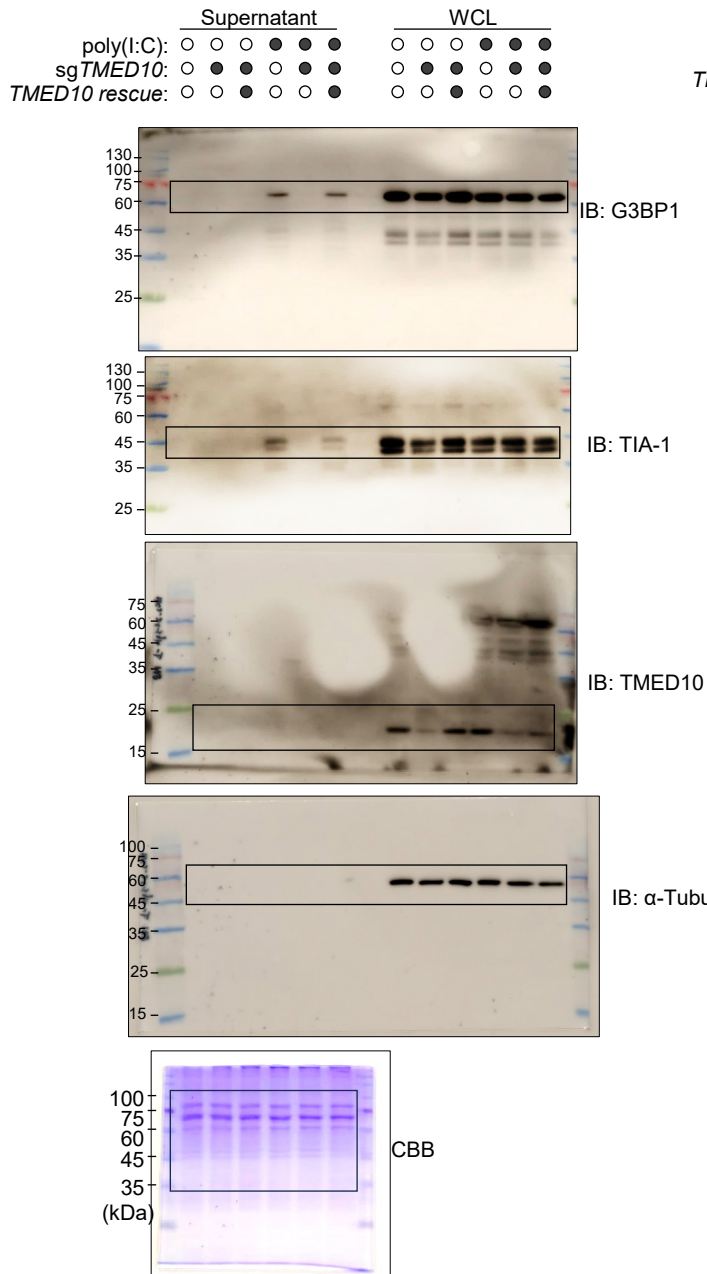**Fig.3b**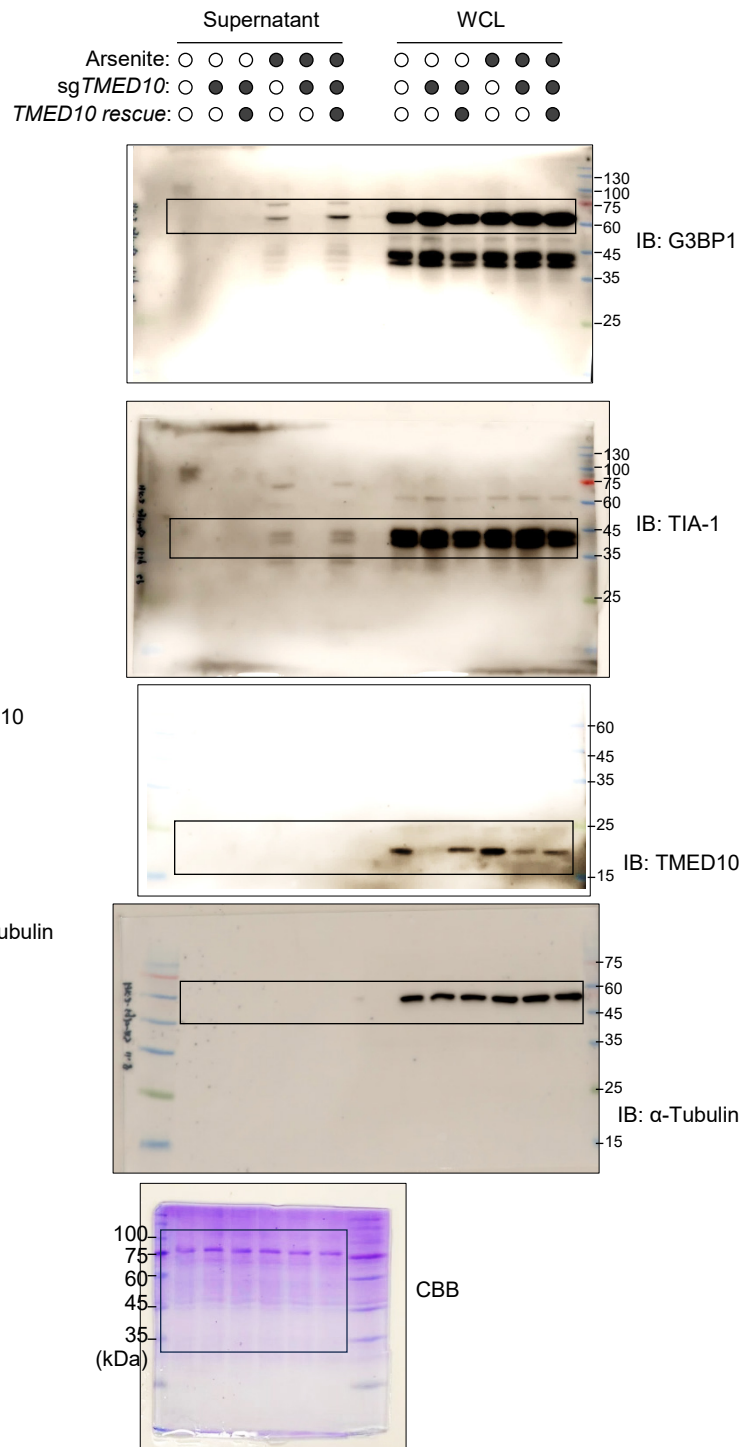

# Fig.3

### Fig.3f

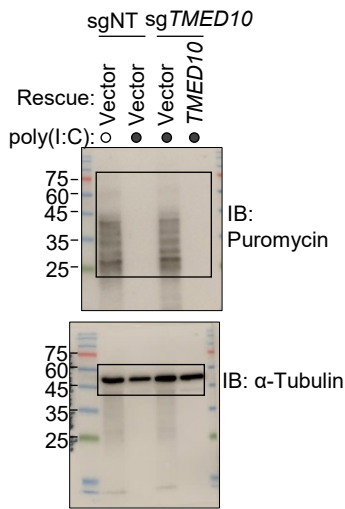

### Fig.3g

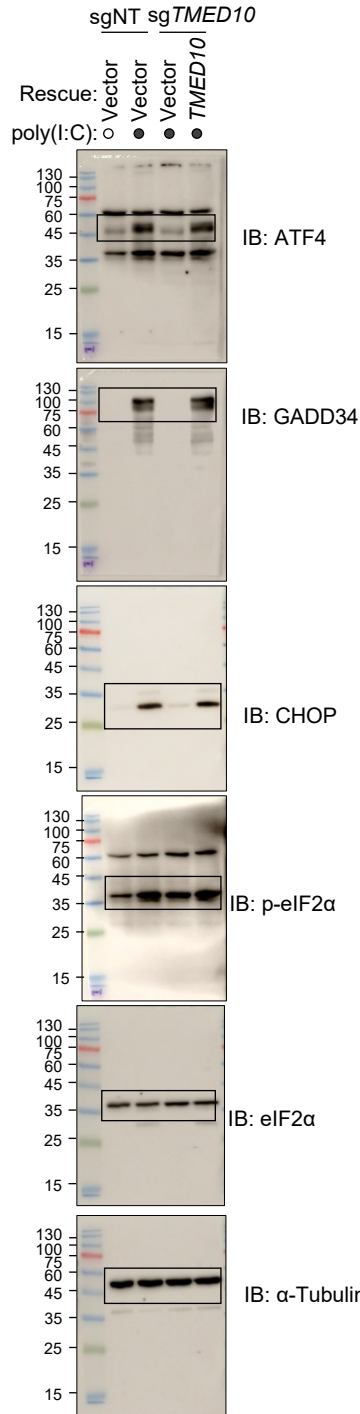

### Fig.3i

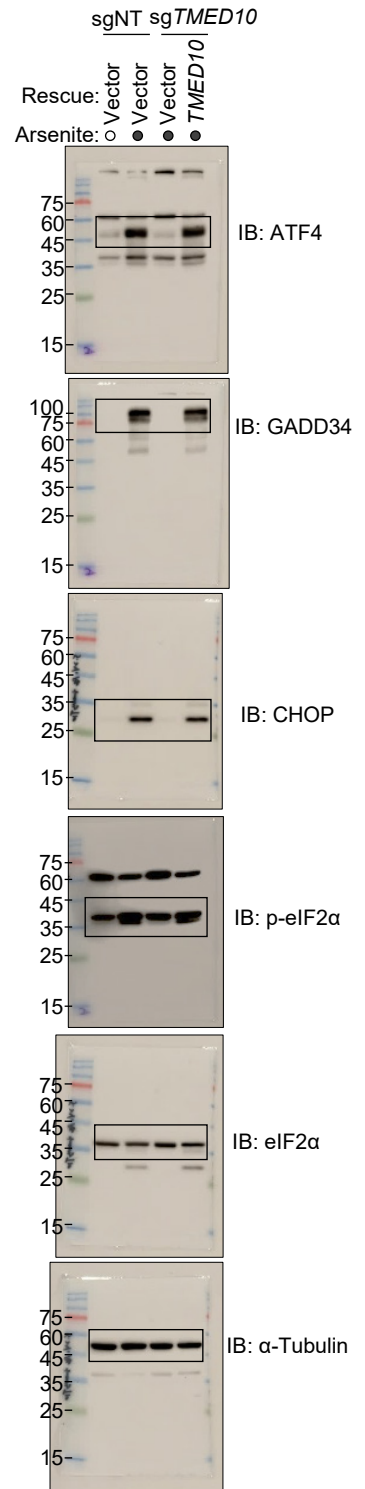

### Fig.3h

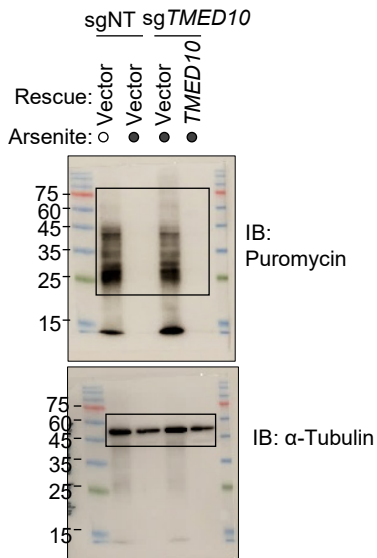

# Fig.4

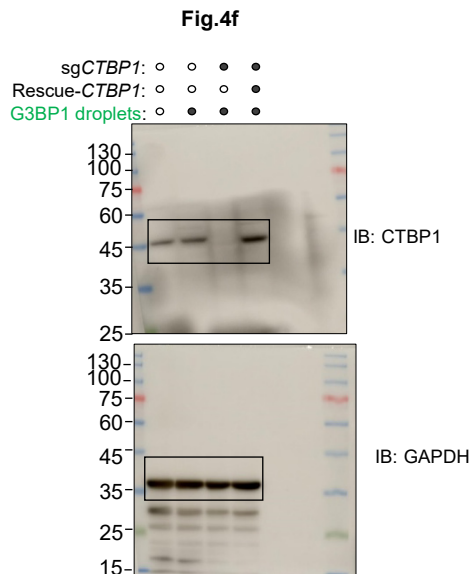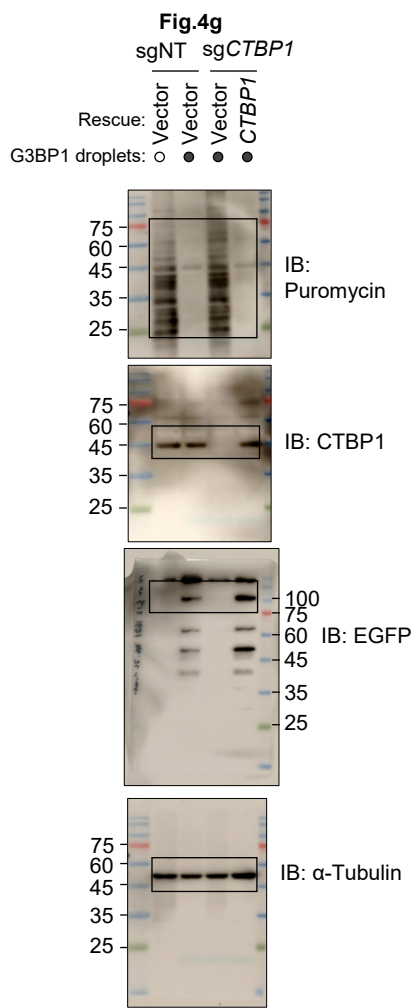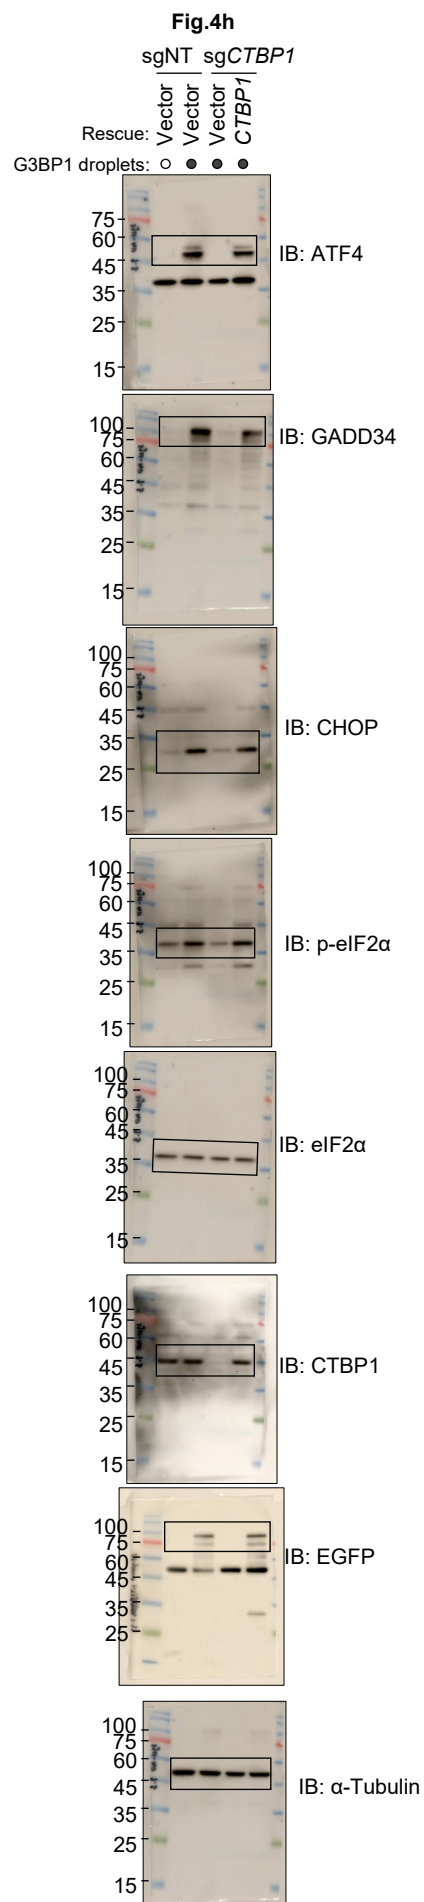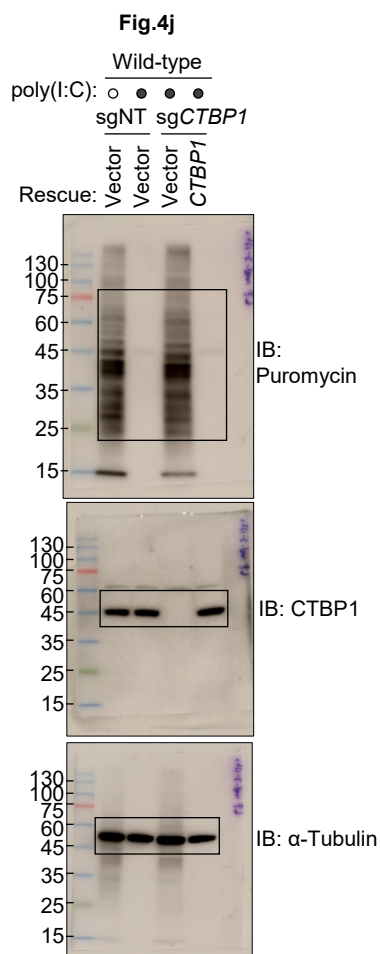

**Fig.4**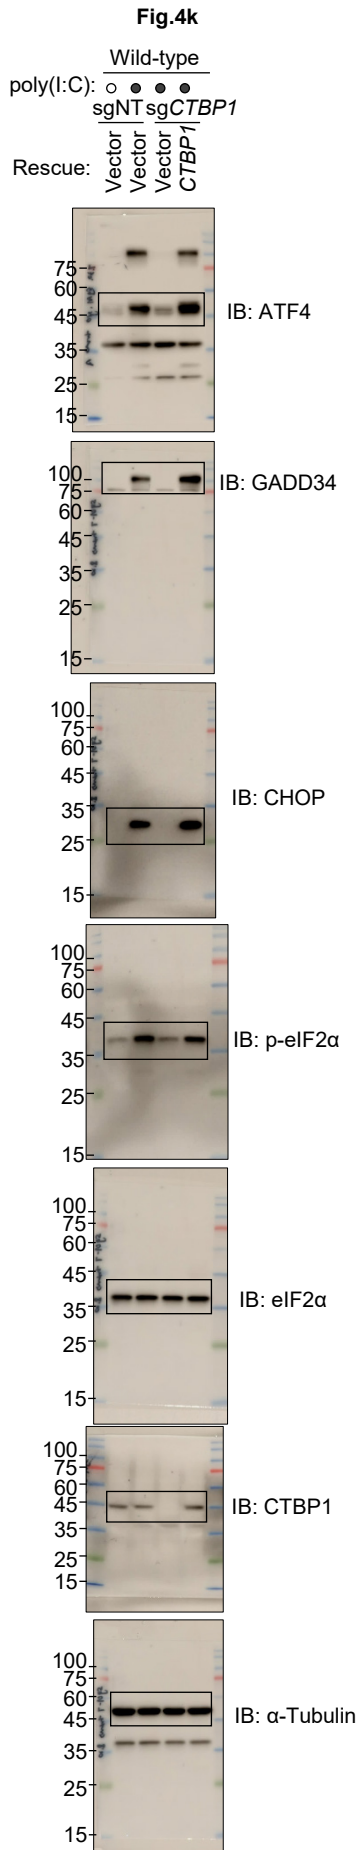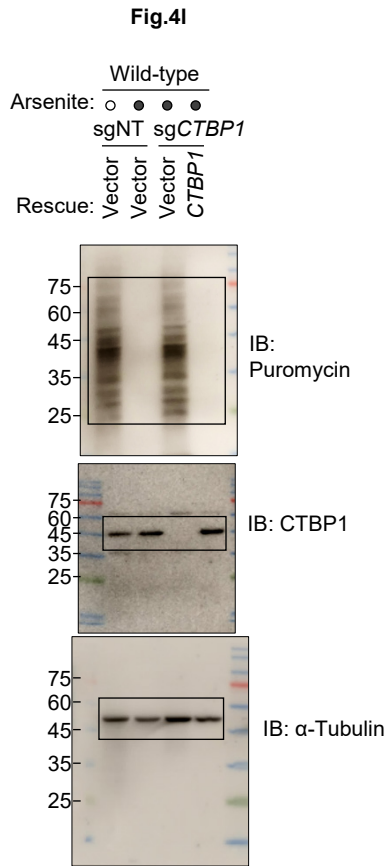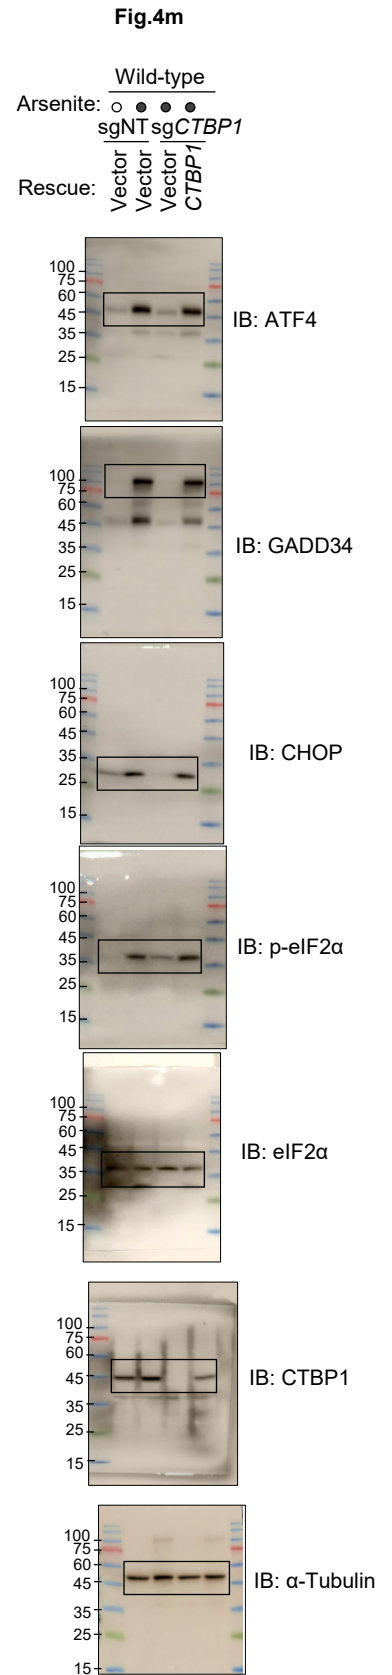

# Extended Data Fig. 2

Extended Data Fig. 2a

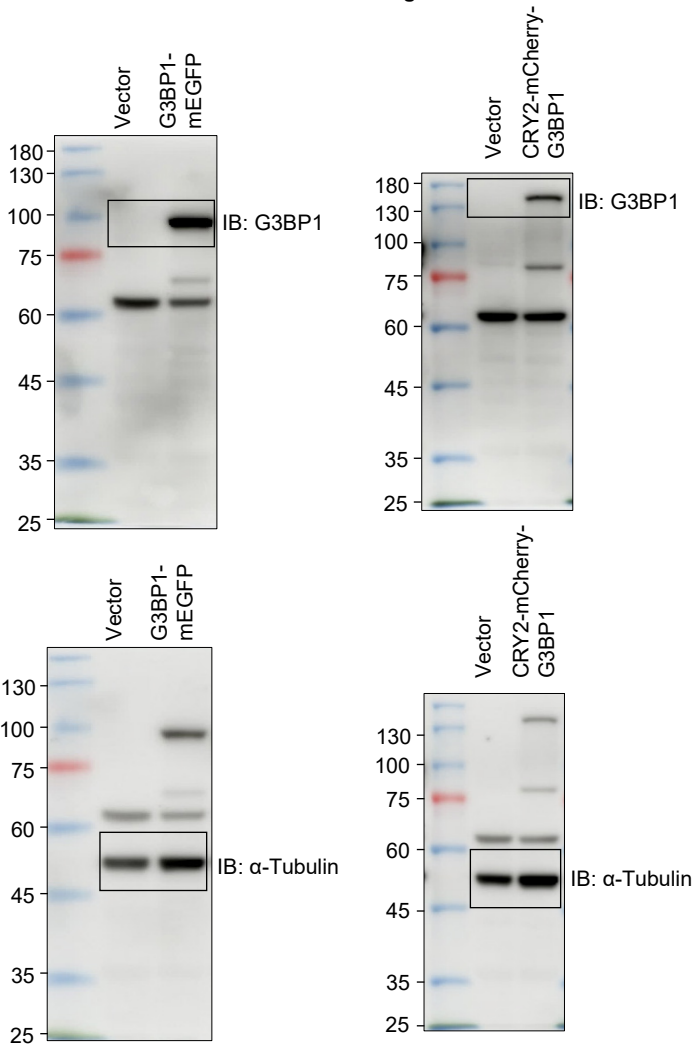

Extended Data Fig. 2b

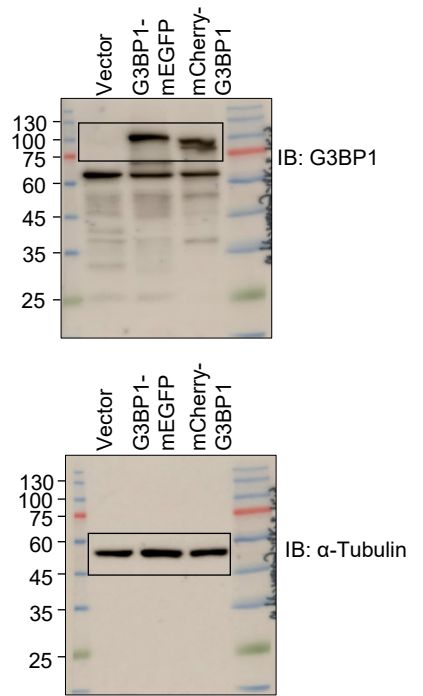

Extended Data Fig. 2d

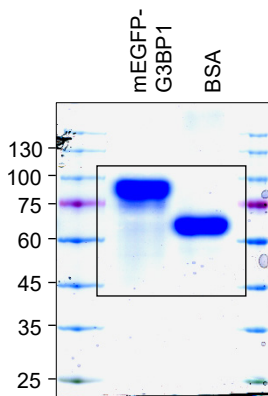

Extended Data Fig. 2g

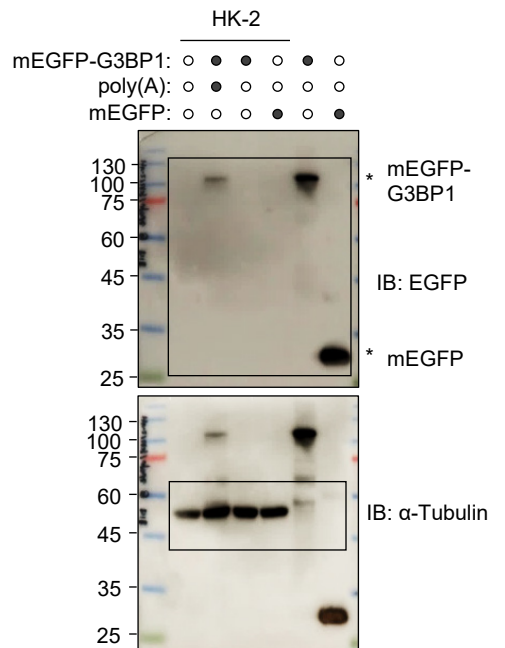

# Extended Data Fig. 3

**Extended Data Fig. 3a**

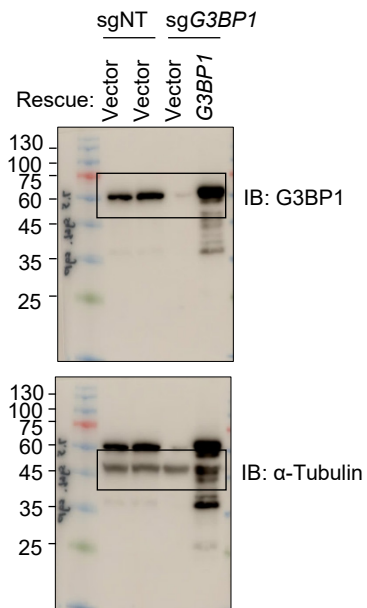

**Extended Data Fig. 3c**

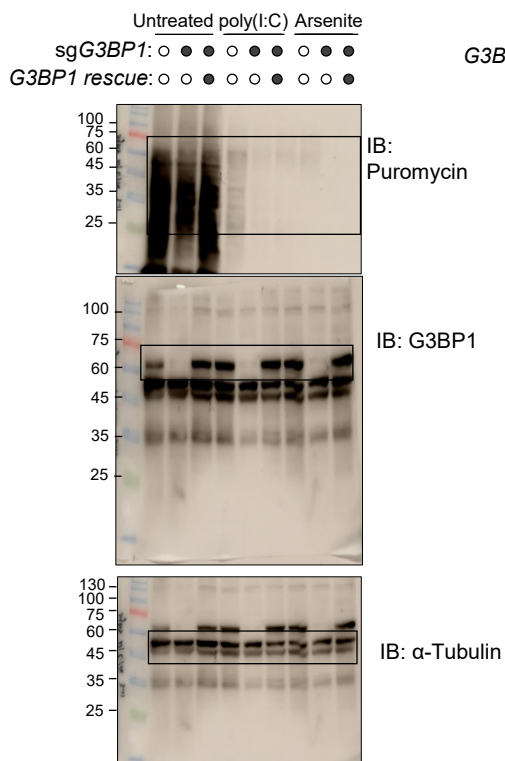

**Extended Data Fig. 3d**

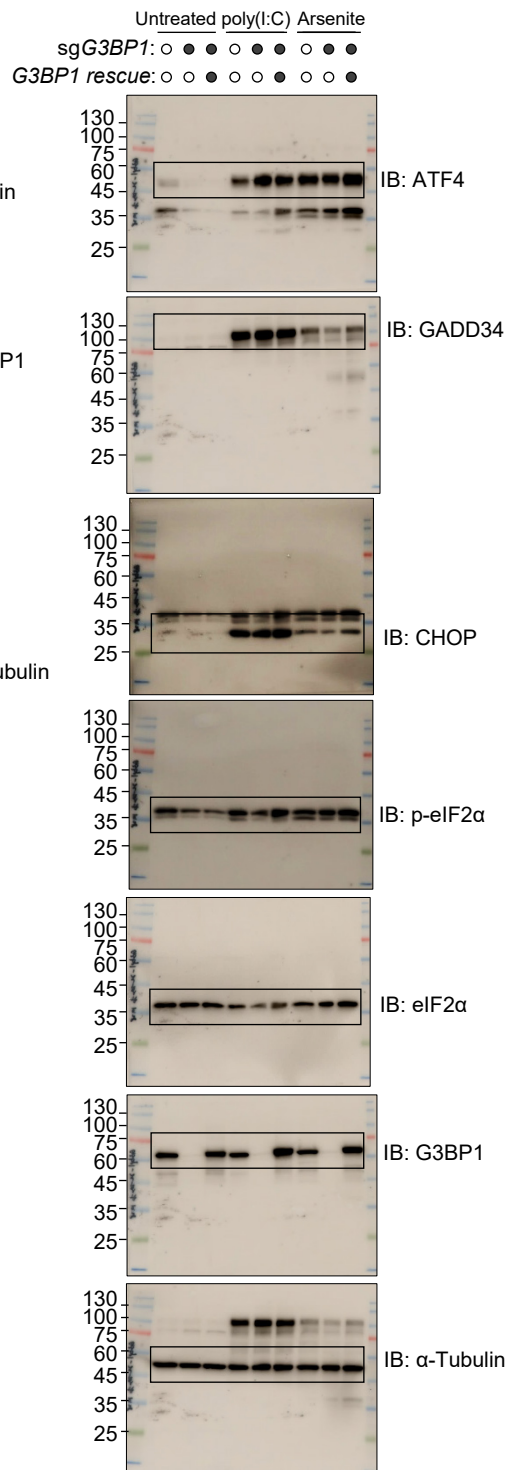

**Extended Data Fig. 3e**

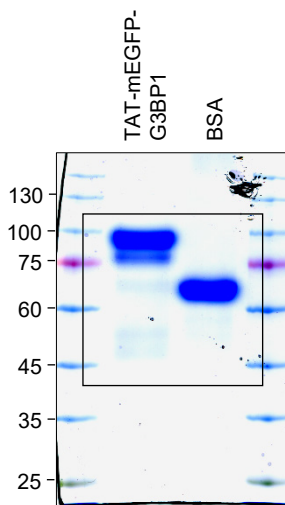

### Extended Data Fig. 3

Extended Data Fig. 3g

poly(A): ○ ● ○ ○ ○ ●  
 Lipo2000: ○ ○ ● ○ ○ ○  
 mEGFP-G3BP1: ○ ○ ○ ● ○ ●  
 TAT-mEGFP-G3BP1: ○ ○ ○ ○ ● ○

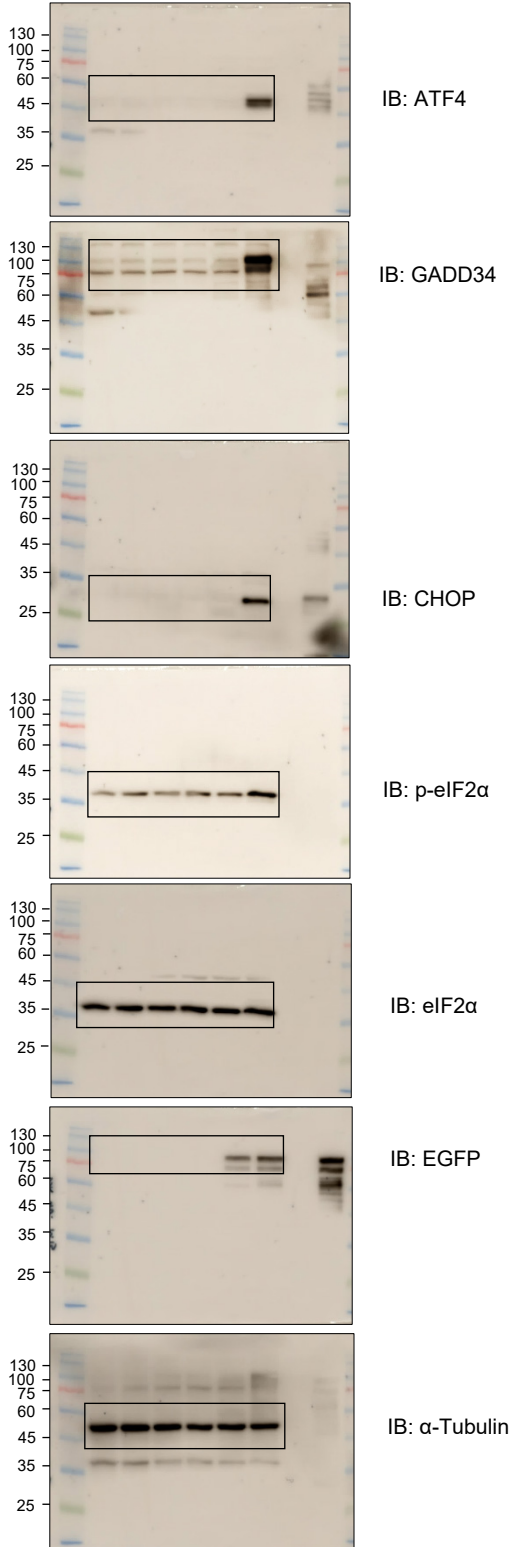

Extended Data Fig. 3h

poly(A): ○ ● ○ ○ ○ ●  
 Lipo2000: ○ ○ ● ○ ○ ○  
 mEGFP-G3BP1: ○ ○ ○ ● ○ ●  
 TAT-mEGFP-G3BP1: ○ ○ ○ ○ ● ○

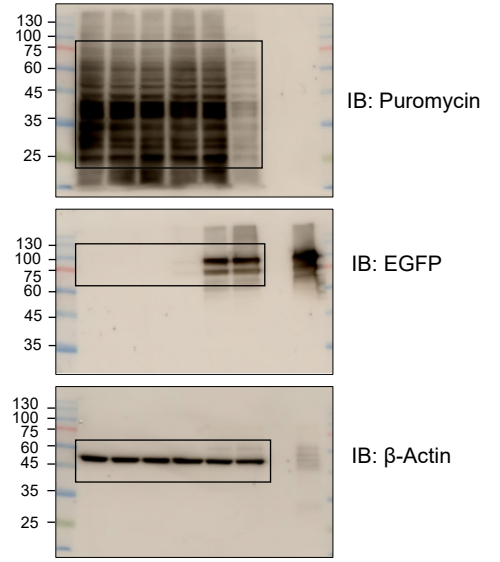

# Extended Data Fig. 4

## Extended Data Fig. 4a

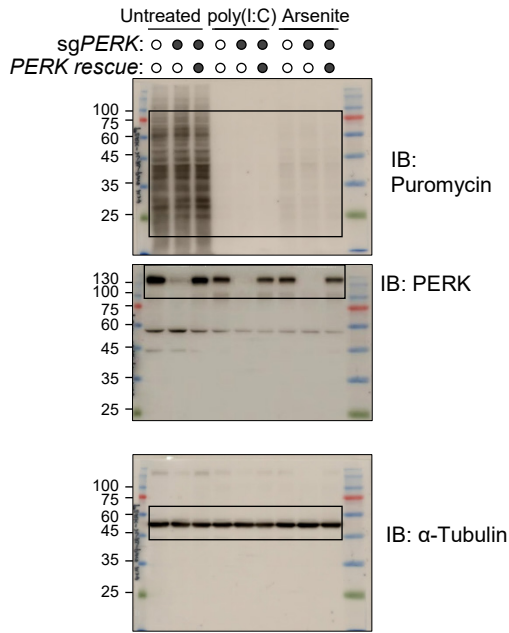

## Extended Data Fig. 4b

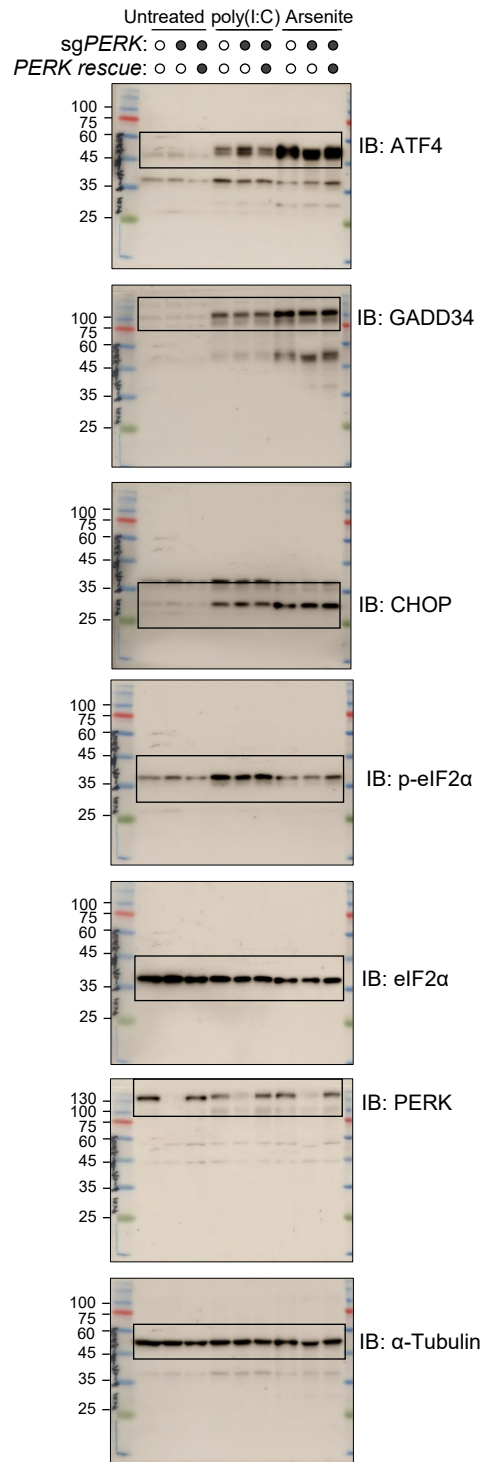

# Extended Data Fig. 4

# Extended Data Fig. 4d

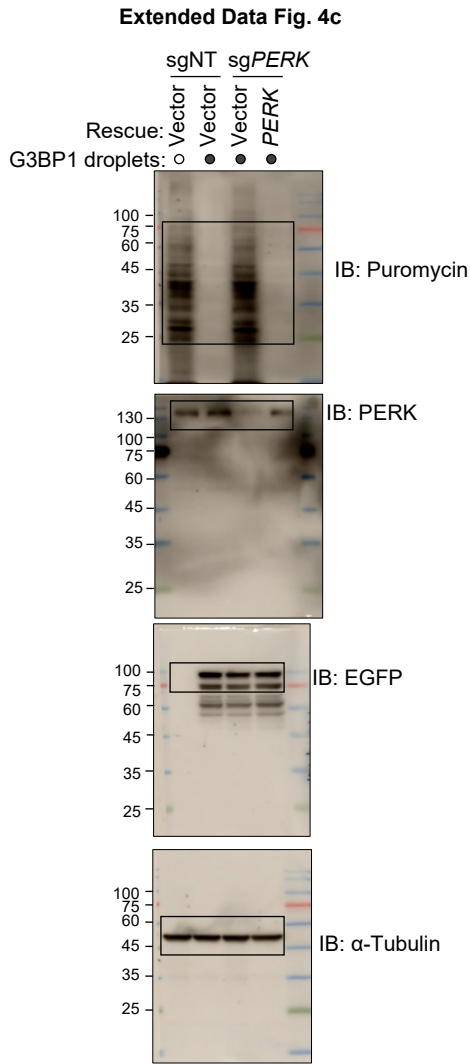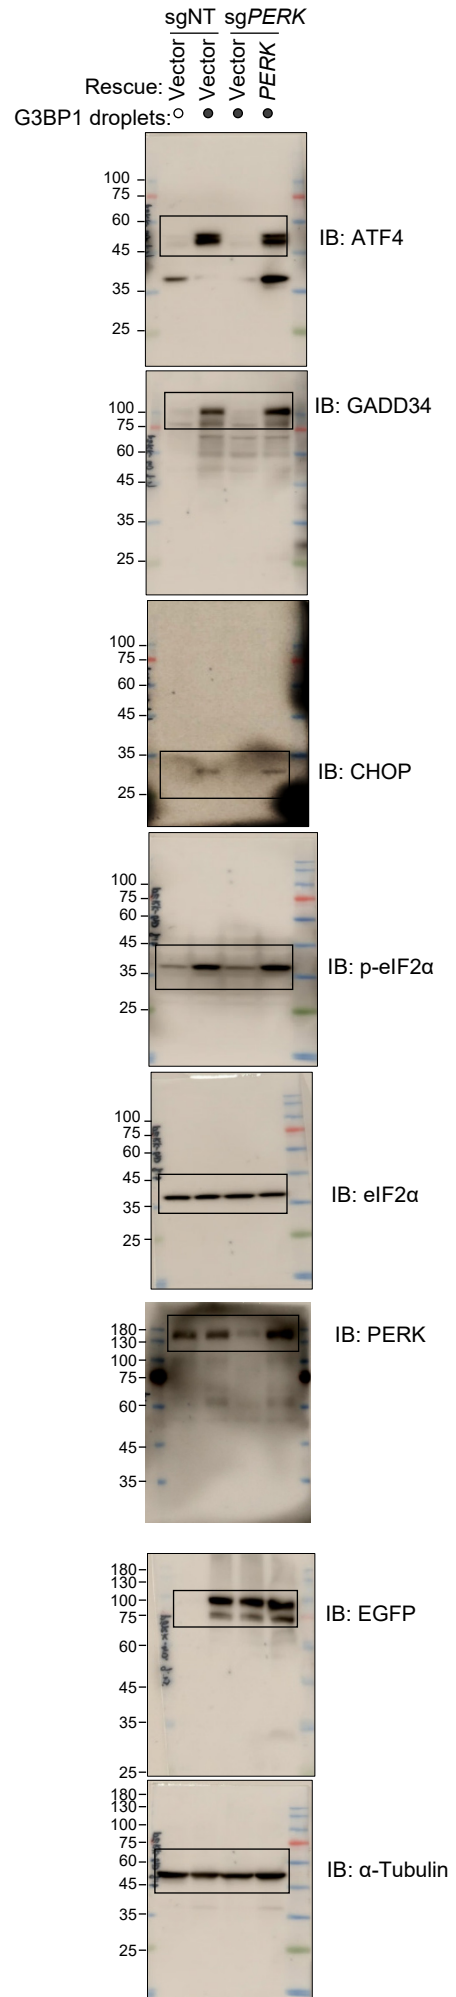

# Extended Data Fig. 4

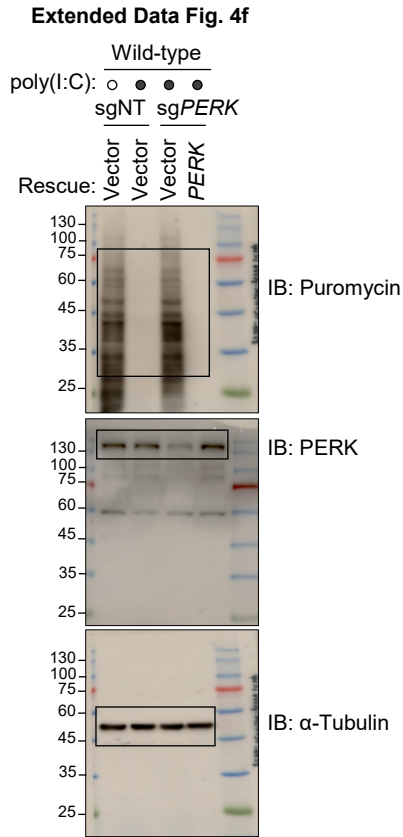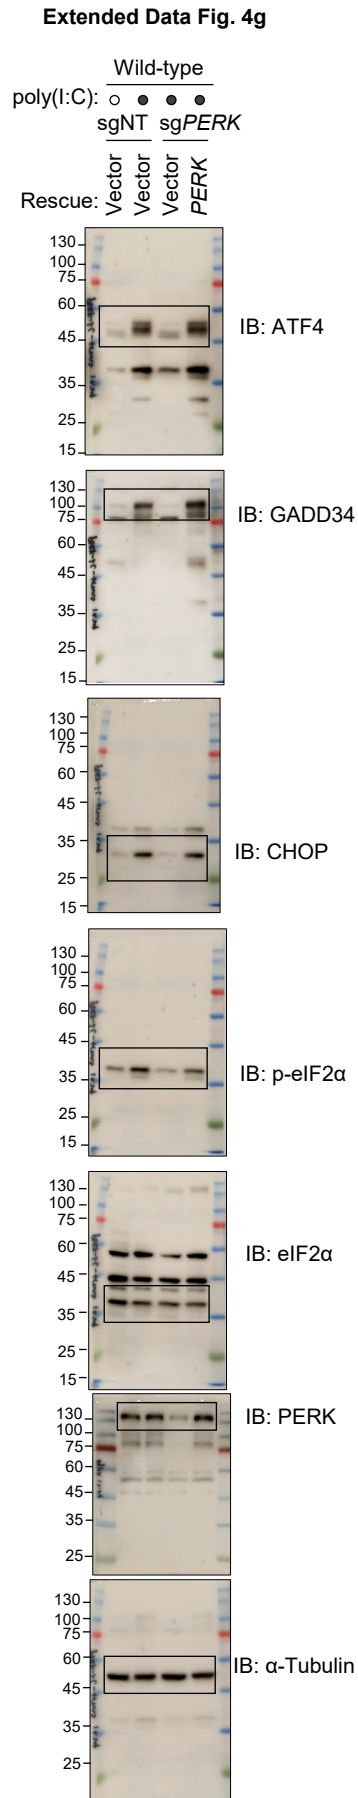

# Extended Data Fig. 4

Extended Data Fig. 4h

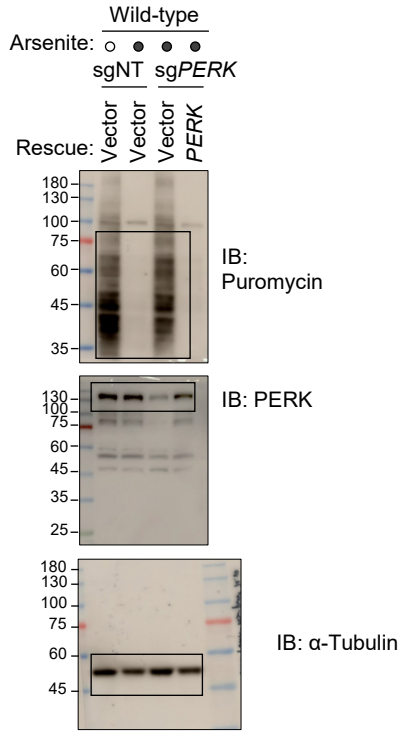

Extended Data Fig. 4i

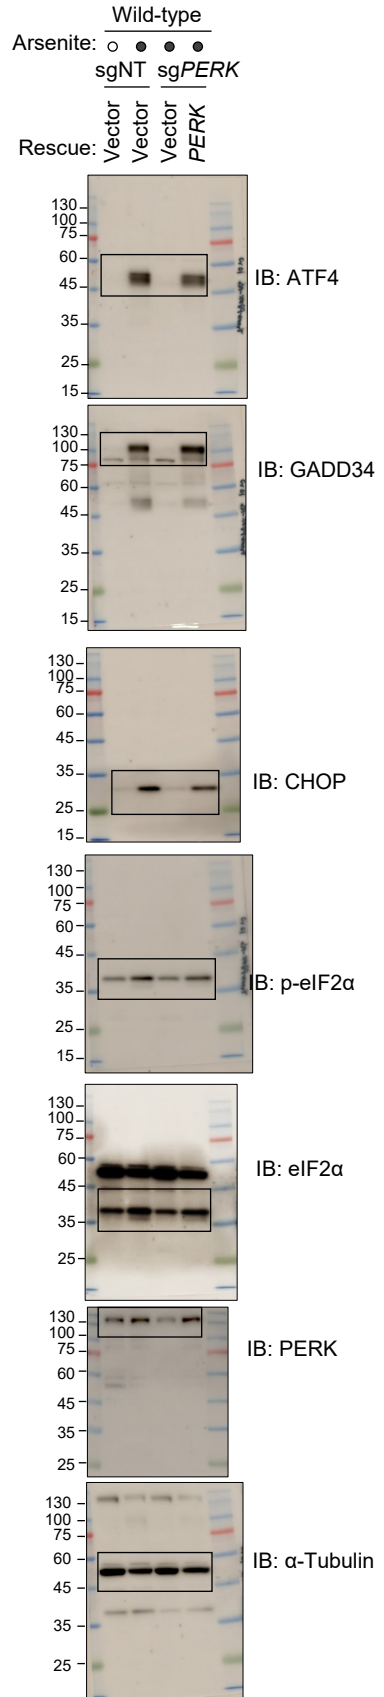

# Extended Data Fig. 5

## Extended Data Fig. 5a

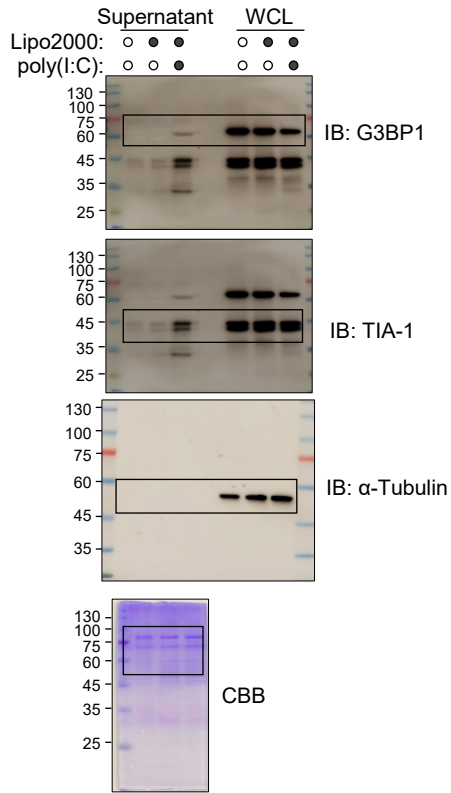

## Extended Data Fig. 5b

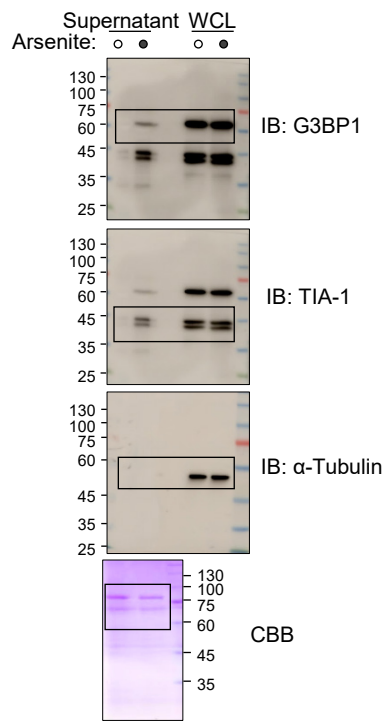

## Extended Data Fig. 5d

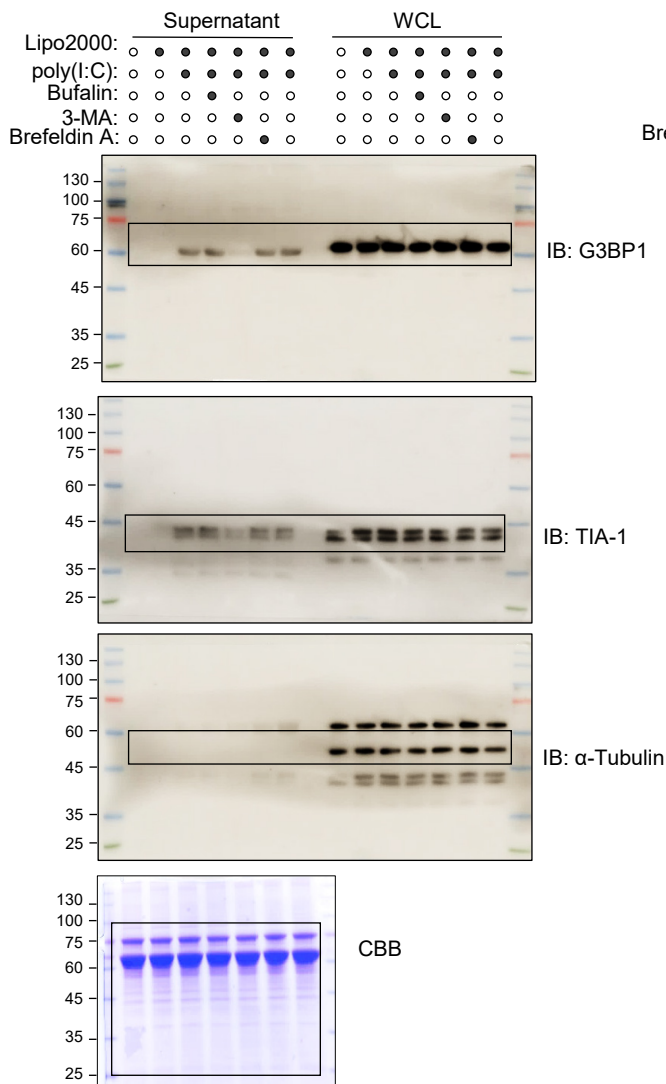

## Extended Data Fig. 5e

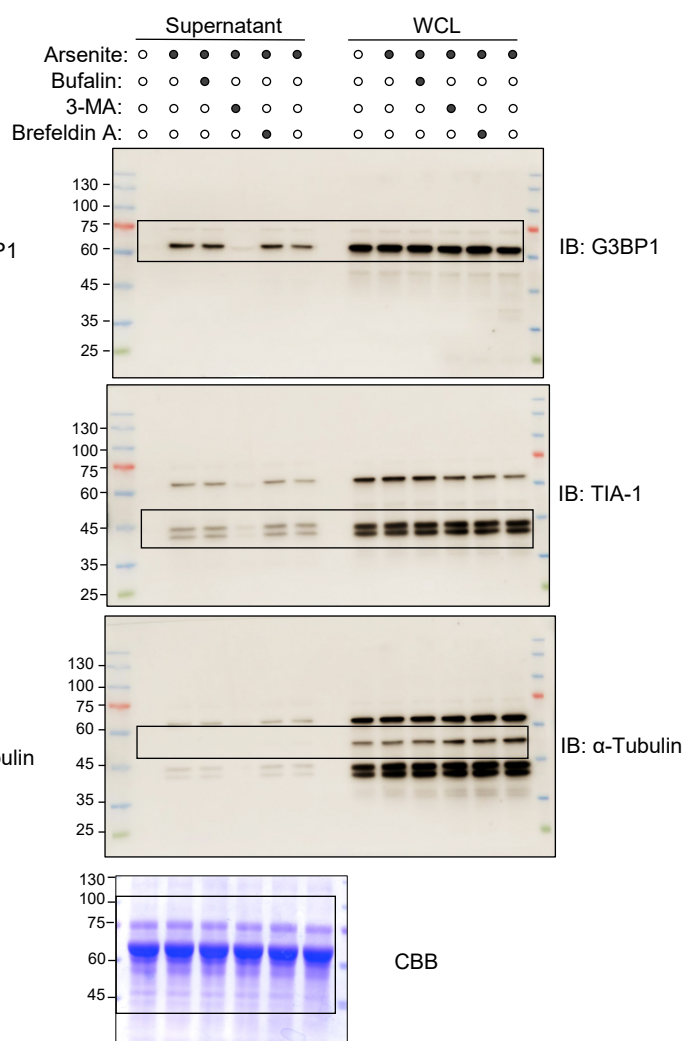



# Extended Data Fig. 6

## Extended Data Fig. 6e

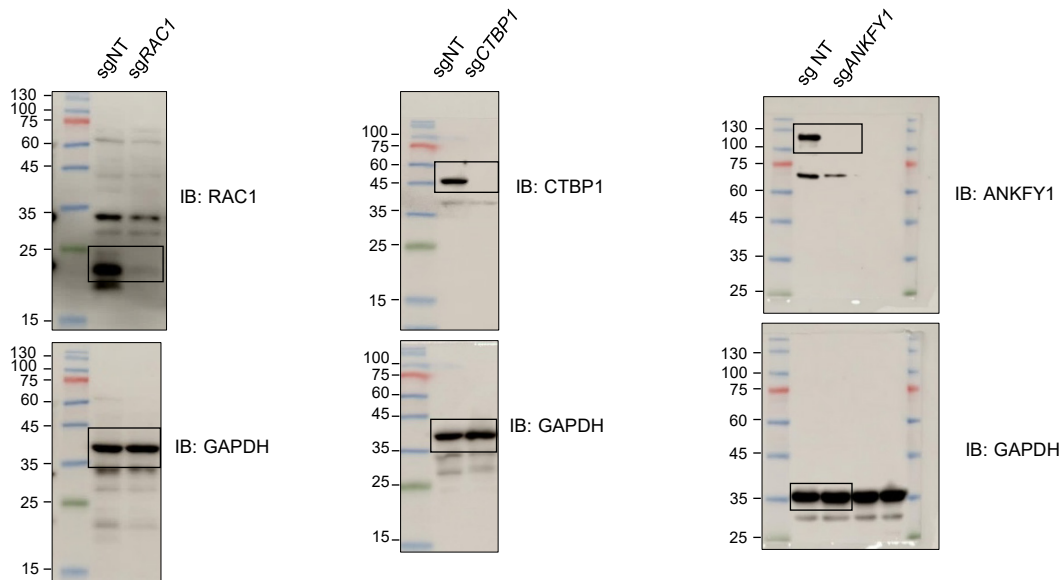

## Extended Data Fig. 6f

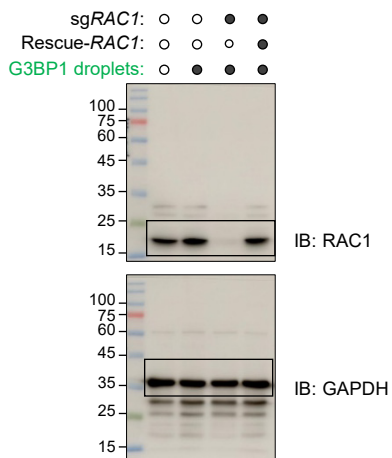

## Extended Data Fig. 6g

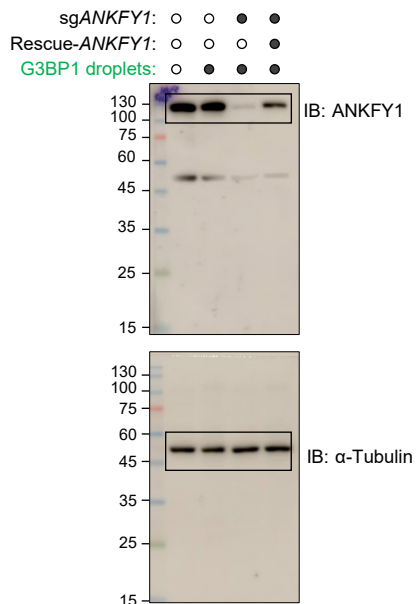

# Extended Data Fig. 7

Extended Data Fig. 7a

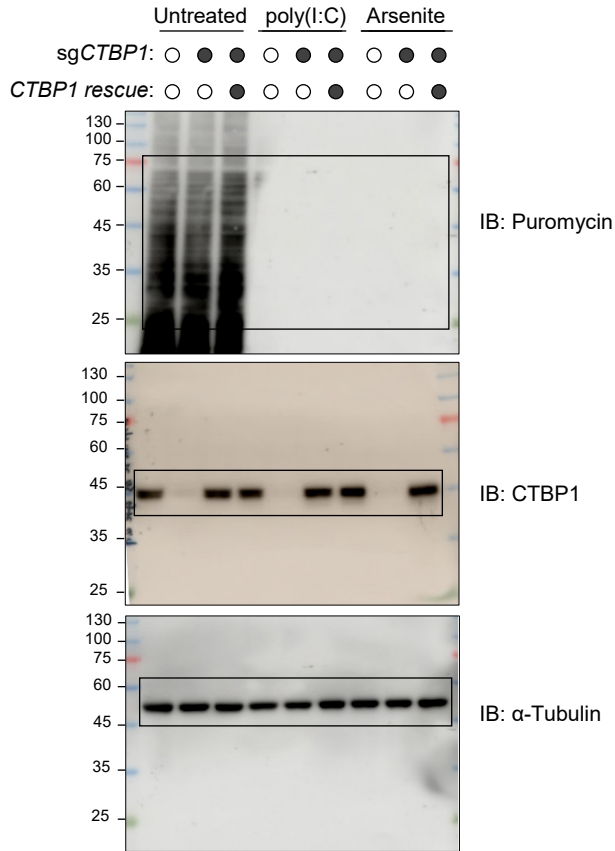

Extended Data Fig. 7b

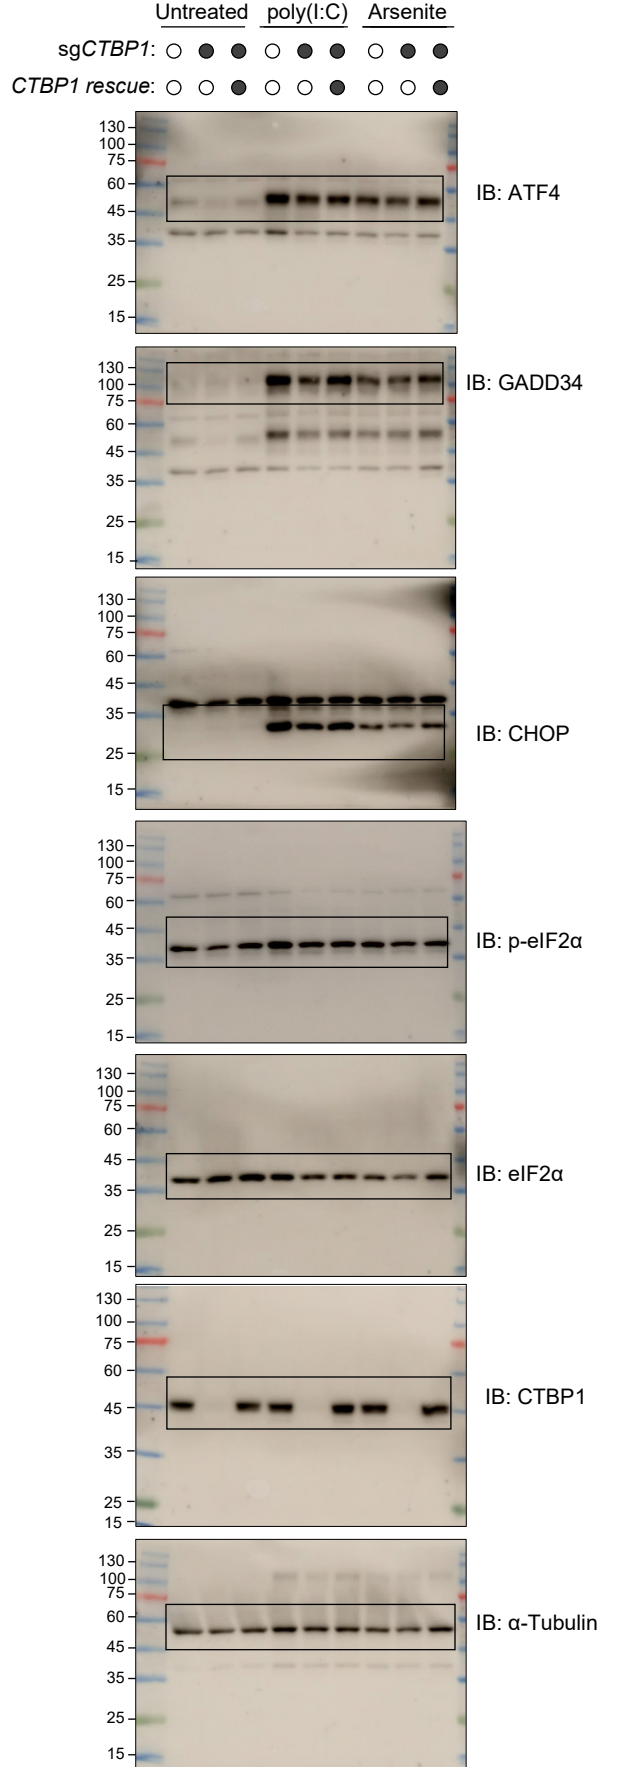

# Extended Data Fig. 7

Extended Data Fig. 7c

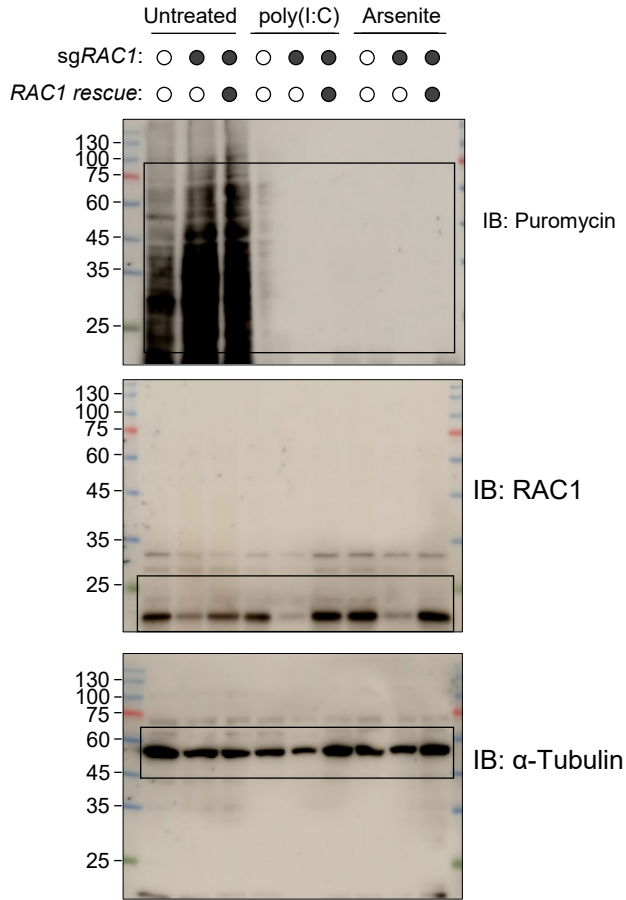

Extended Data Fig. 7d

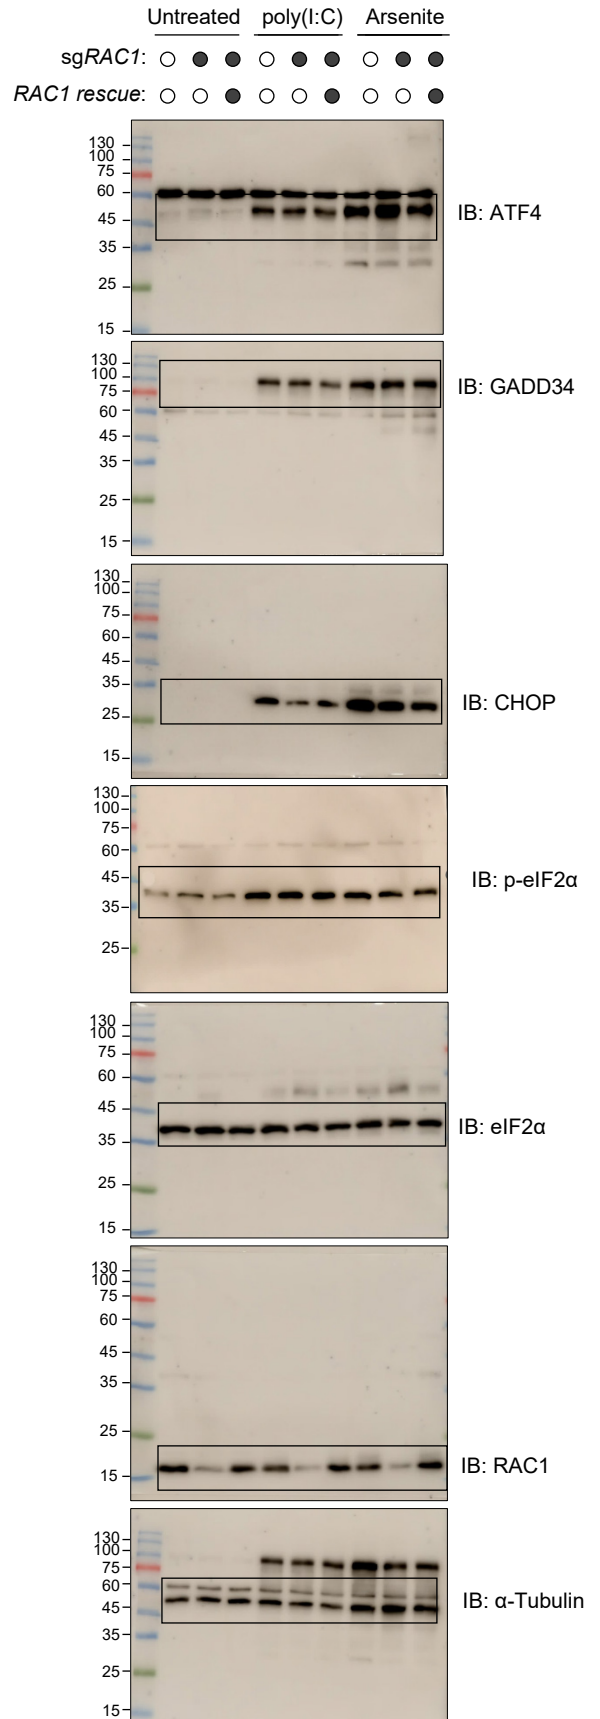

# Extended Data Fig. 7

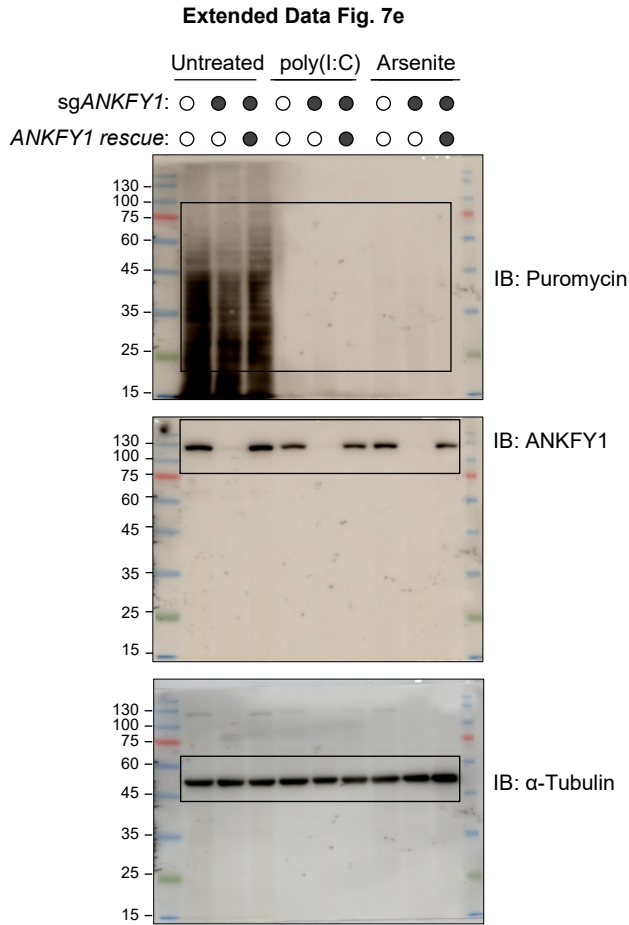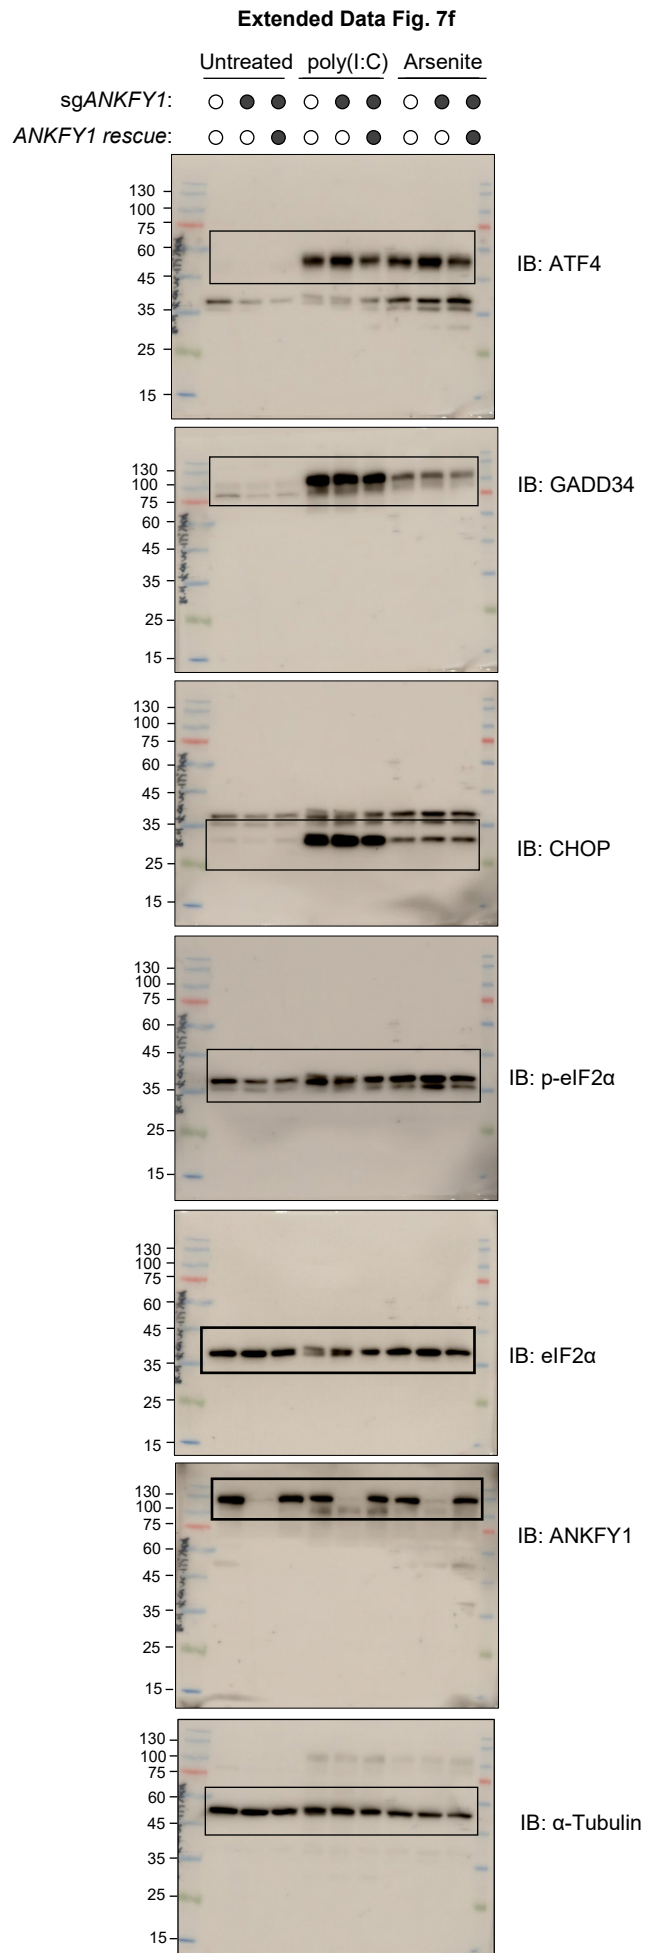

# Extended Data Fig. 8

## Extended Data Fig. 8a

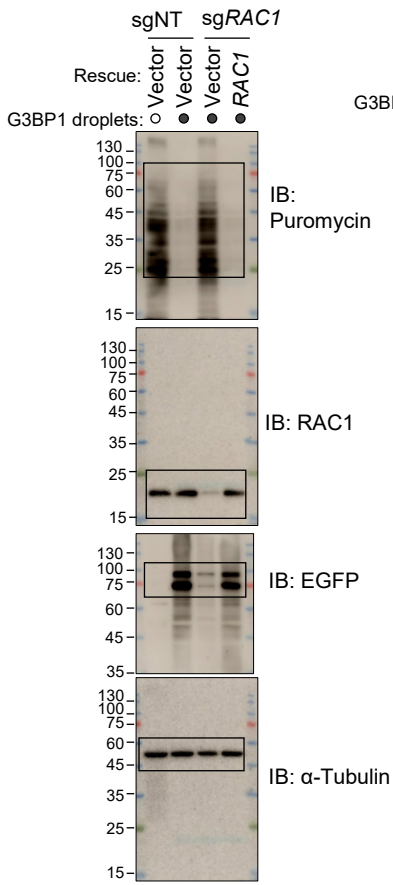

## Extended Data Fig. 8b

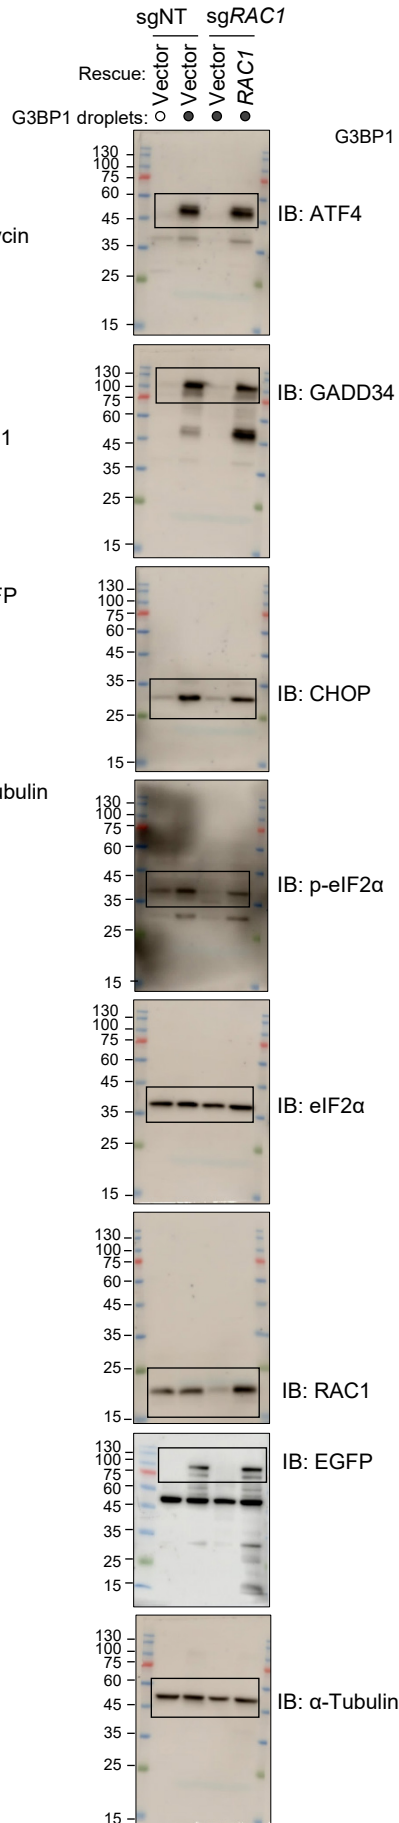

## Extended Data Fig. 8c

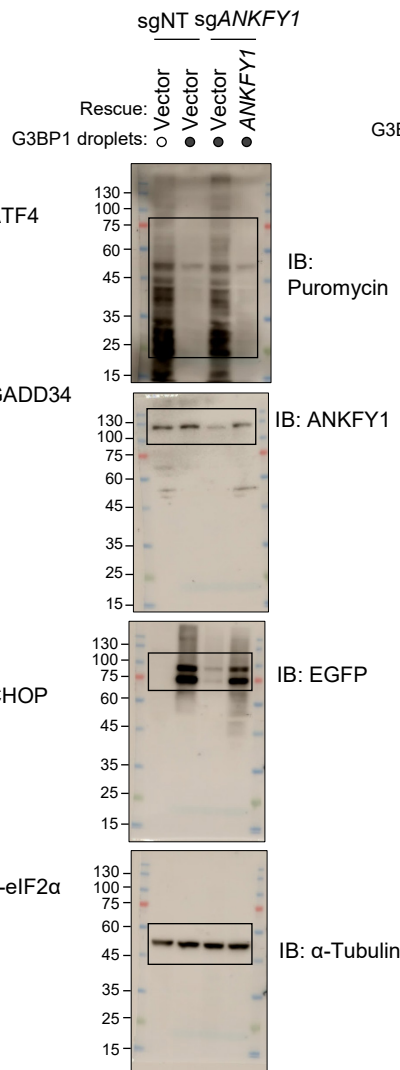

## Extended Data Fig. 8d

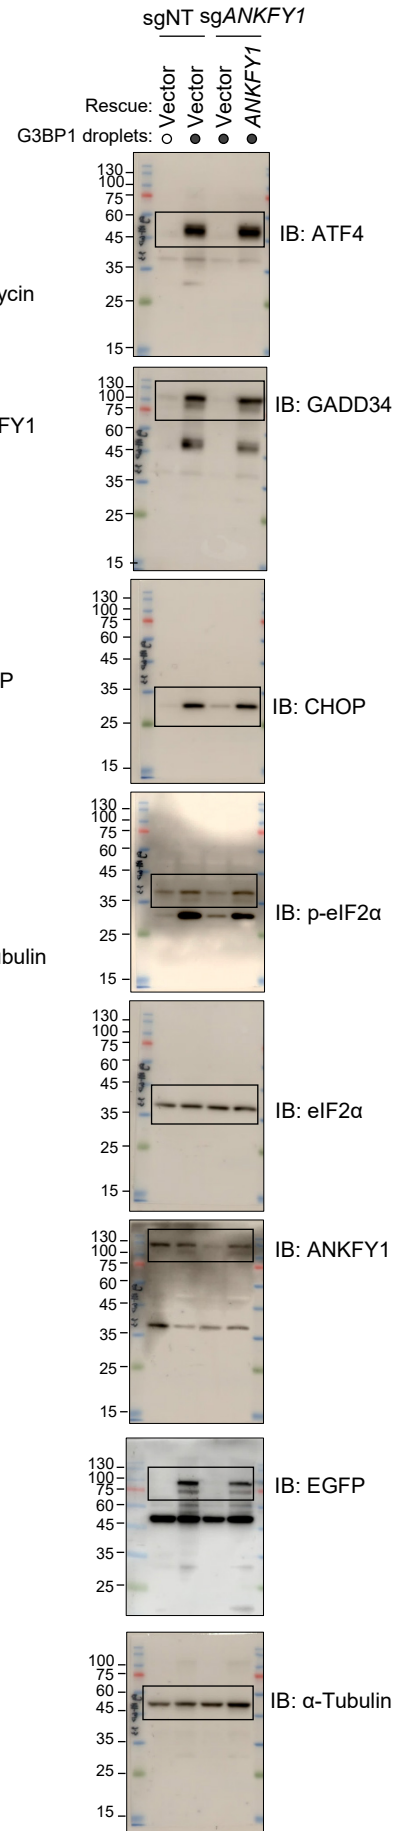

# Extended Data Fig. 8

Extended Data Fig. 8e

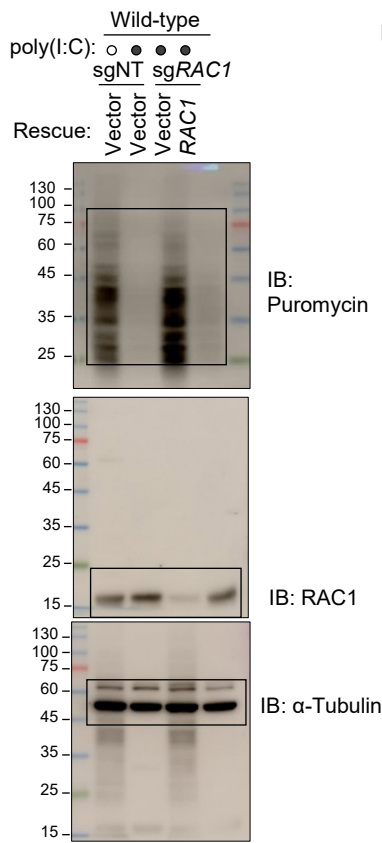

Extended Data Fig. 8f

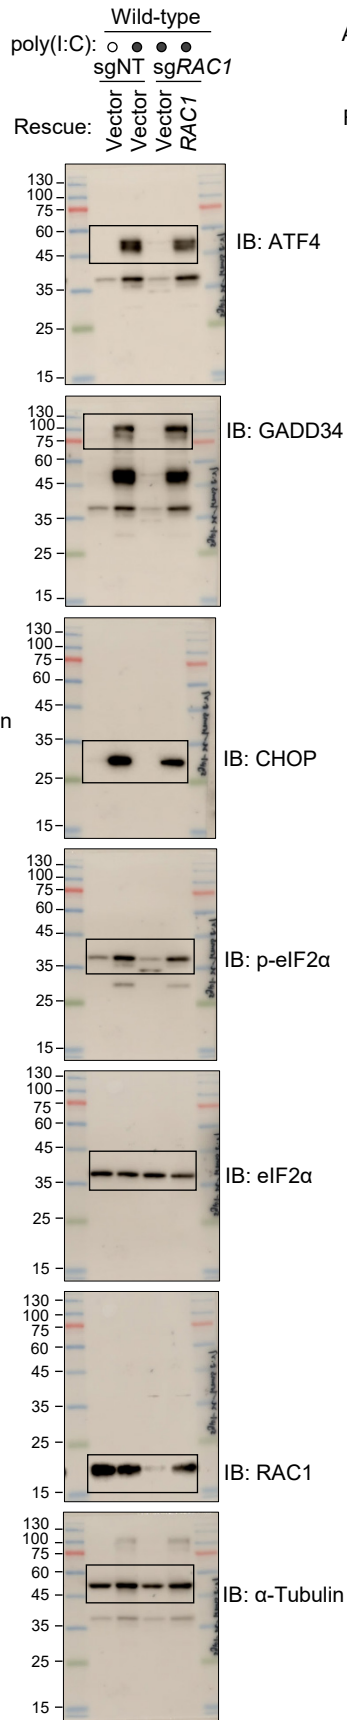

Extended Data Fig. 8g

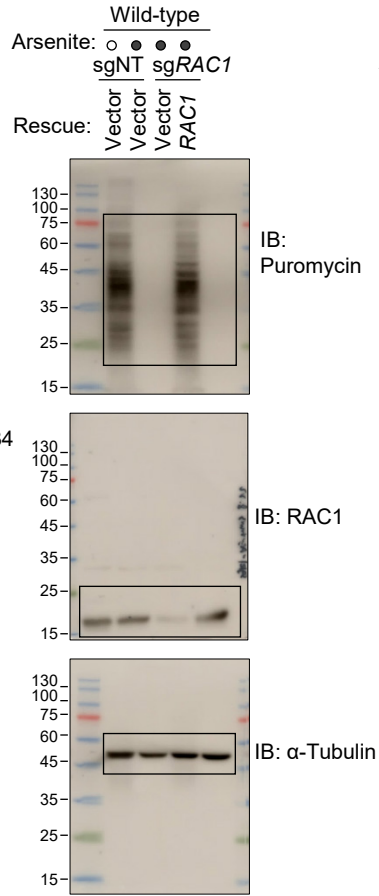

Extended Data Fig. 8h

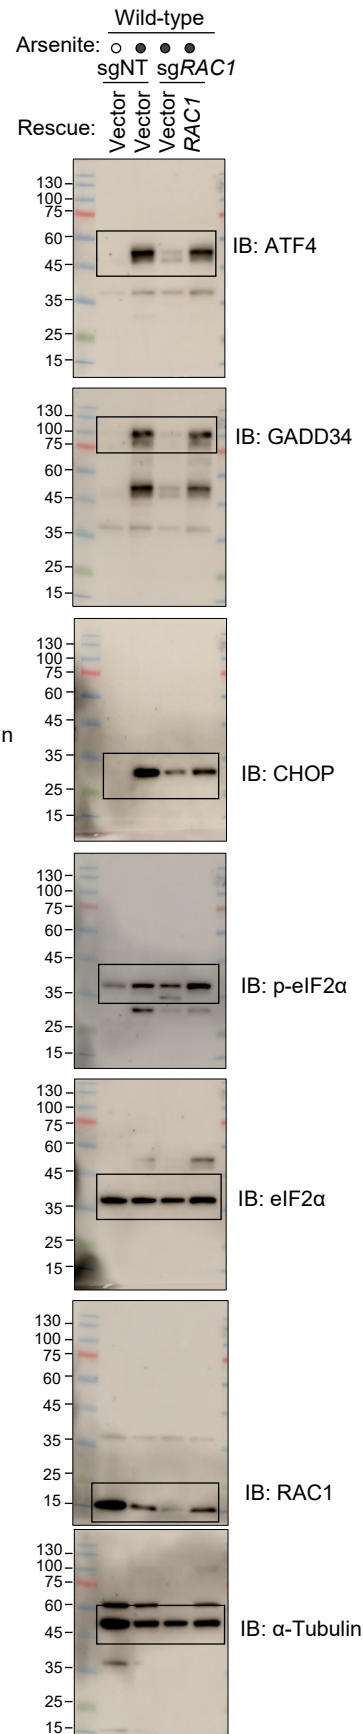

# Extended Data Fig. 8

Extended Data Fig. 8i

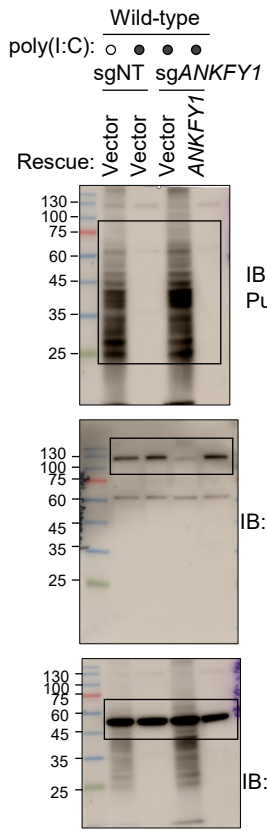

Extended Data Fig. 8j

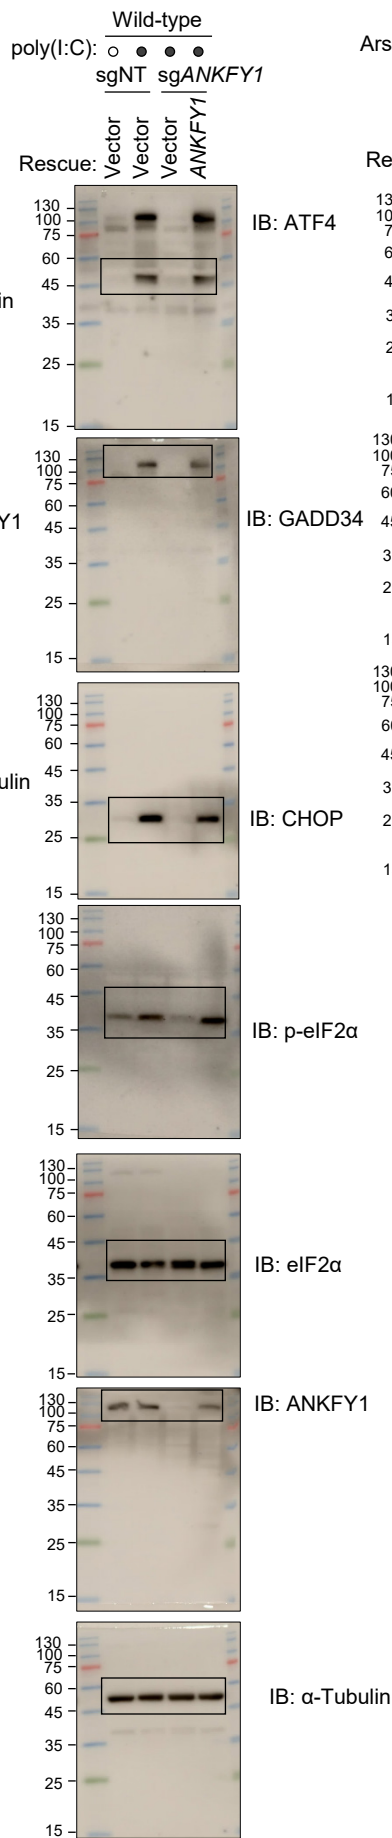

Extended Data Fig. 8k

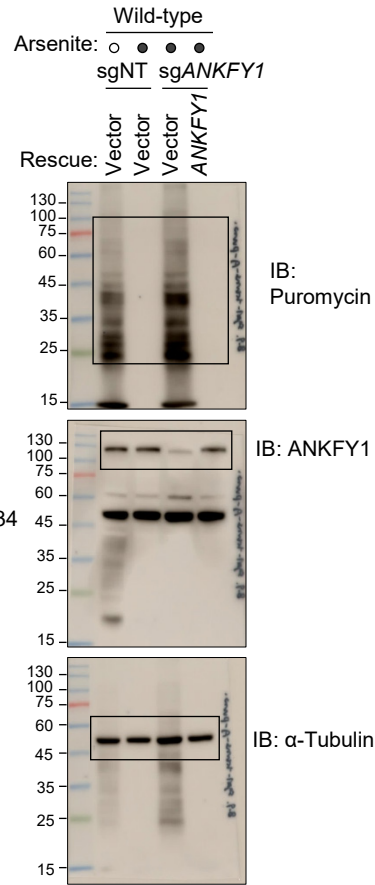

Extended Data Fig. 8l

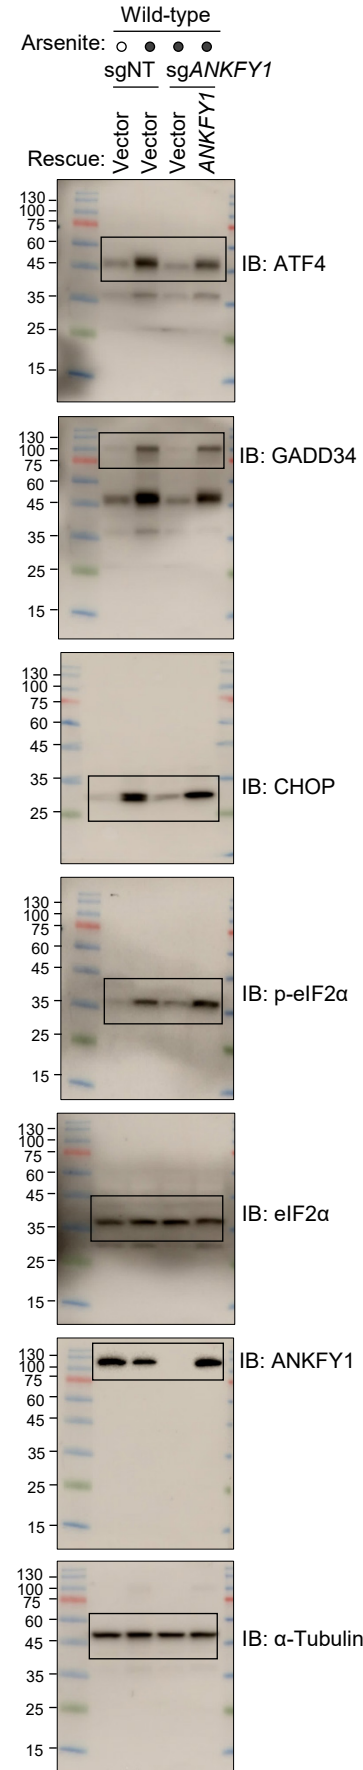

Supplement: Supplementary file 1 [file 3b266e9f1a79b7db0e6acea5.pdf]
