# Supplementary material
Source: Research Square preprint supplement (doi:10.21203/rs.3.rs-9629444/v1)
Supplement: Supplementary file 1 [file de8d2359b110b90706ff703e.xlsx]

## Sheet: QPCR primer
Gene ID	Gene name	Forward primers(5'→3')	Reverse primers(5'→3')
14447	Mouse Gapdh	GGCAAATTCAACGGCACAGT	CTCGTGGTTCACACCCATCA
17872	Mouse Gadd34	TACCCCTGTCTCTGGTAACCT	TGGCTTTGCATTGTACTCATCA
11911	Mouse Atf4	GTTTGACTTCGATGCTCTGTTTC	GGGCTCCTTATTAGTCTCTTGG
13198	Mouse Chop	CTGGAAGCCTGGTATGAGGAT	CAGGGTCAAGAGTAGTGAAGGT

## Sheet: sgRNA
Gene ID	Gene name	Single-guide RNAs (sgRNAs)(5'→3')
10146	Human G3BP1(sg3)	AGGCCCCAGACATGCTGCAT
1487	Human CTBP1(sg1)	GATGTGGCACAGCGTCGAGT
5879	Human RAC1(sg1)	GAAAATGTCCGTGCAAAGGT
51479	Human ANKFY1(sg1)	AGACCTGCGAATAAGAAAGC
10972	Human TMED10(sg2)	TAACGGAAAAGGGCCGCGCC
440275	Human GCN2(sg2)	TGTGCACTACCTATACATCC
9451	Human PERK(sg1)	TTAGCCAAGCTTGAACACCC
