# Supplementary material
Source: Research Square preprint supplement (doi:10.21203/rs.3.rs-9629444/v1)
Supplement: Supplementary file 2 [file 686c926f1bcb72f9b305b869.pdf]

# Supplementary Information

## Cell-to-cell transmission of stress granules propagates integrated stress response

### Authors:

Ming Zhao<sup>1,4</sup>, Liu-Bing Yu<sup>1,2,4</sup>, Chen-Xin Liu<sup>3,4</sup>, Min-Yi Feng<sup>1</sup>, Xue-Qing Zhou<sup>1</sup>, Hui-Zi Yue<sup>1</sup>, Hong Cai<sup>1</sup>, Tian Xia<sup>1</sup>, Yu Yu<sup>1</sup>, Qiu-Ying Han<sup>1</sup>, Kai Wang<sup>1</sup>, Xu Xin<sup>1</sup>, Li-Bing Yin<sup>1</sup>, Shou-Nian Li<sup>1</sup>, Liang Chen<sup>1</sup>, Kun He<sup>1</sup>, Ai-Ling Li<sup>1</sup>, Xue-Min Zhang<sup>1</sup>, Tao Zhou<sup>1,2,\*</sup>, Wen Xue<sup>1,\*</sup>, Tao Li<sup>1,2,3,\*</sup>

### Affiliations:

<sup>1</sup> Nanhu Laboratory, State Key Laboratory of Biomedical Analysis (SKLBA, formerly known as National Center of Biomedical Analysis, NCBA), Beijing 100039, China.

<sup>2</sup> Key Laboratory of Medical Molecular Virology (MOE/NHC/CAMS), Shanghai Institute of Infectious Disease and Biosecurity, Shanghai Frontiers Science Center of Pathogenic Microorganisms and Infection, School of Basic Medical Sciences, Shanghai Medical College, Fudan University, Shanghai 200032, China.

<sup>3</sup> Institute of Translational Medicine, Zhejiang University School of Medicine, Hangzhou, Zhejiang 310029, China.

<sup>4</sup> These authors contributed equally to this work.

\*Correspondence: [tli@ncba.ac.cn](mailto:tli@ncba.ac.cn); [wxue@xmail.ncba.ac.cn](mailto:wxue@xmail.ncba.ac.cn); [tzhou@ncba.ac.cn](mailto:tzhou@ncba.ac.cn).

**Extended Data Fig. 1**

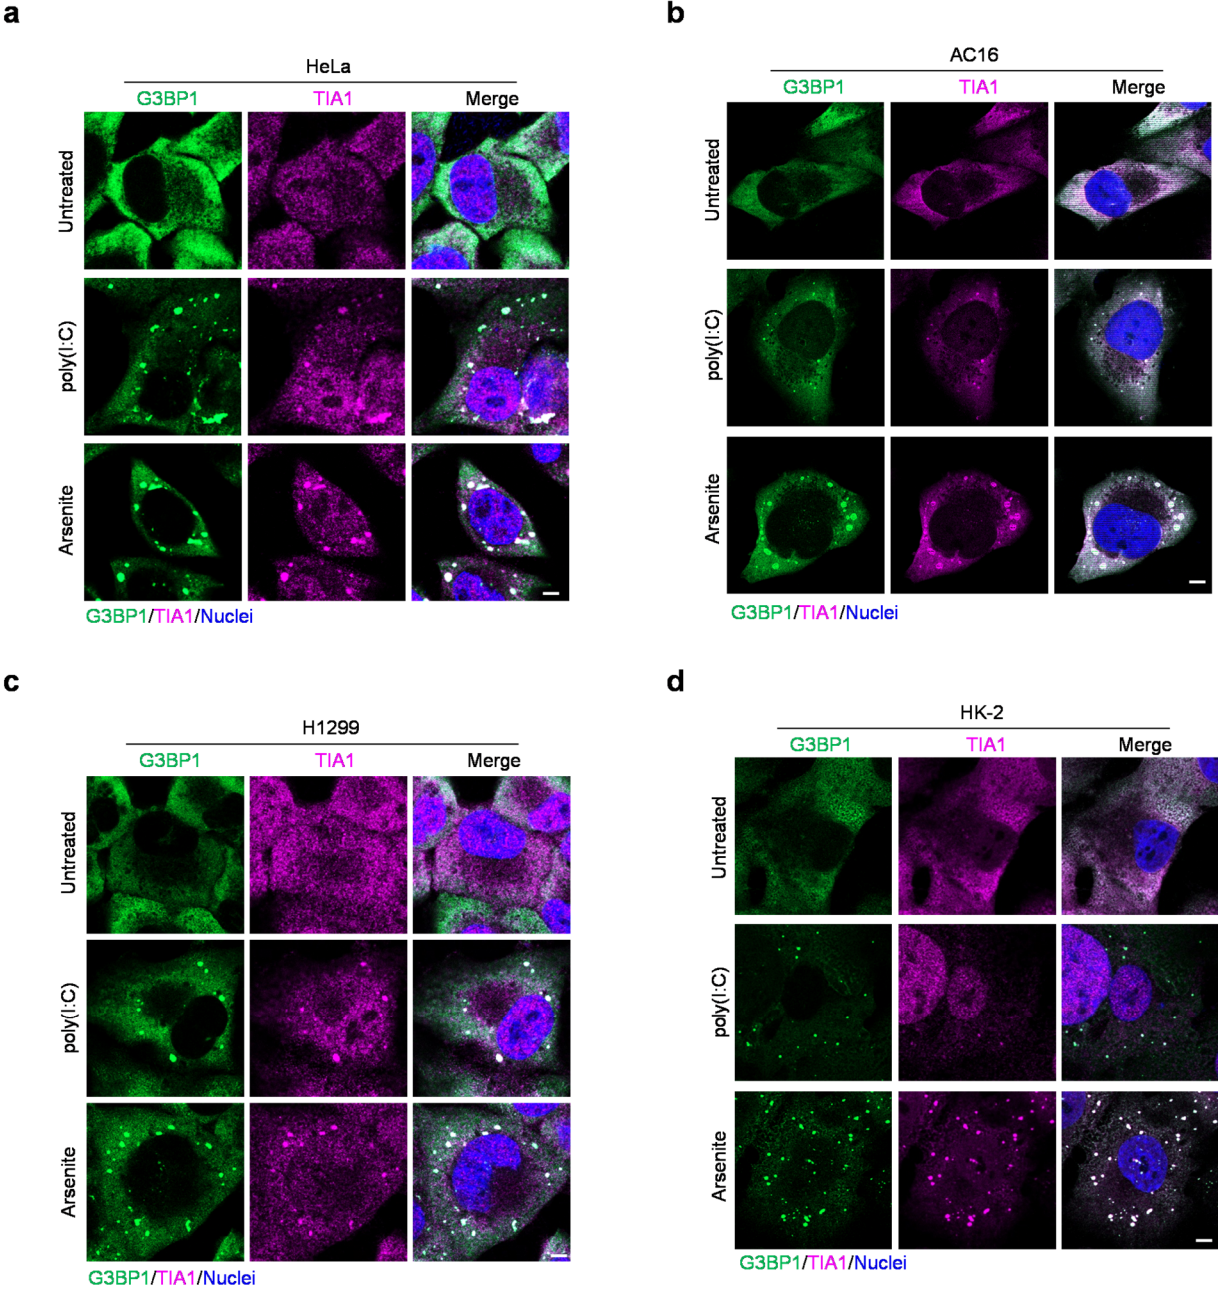

28

29 **Extended Data Fig. 1 | Stress granule formation in cells.** a-d, Immunofluorescence staining of G3BP1 and  
 30 TIA-1 in HeLa (a), AC16 (b), H1299(c) and HK-2 (d) cells following poly(I:C) or arsenite treatment. Scale bars,  
 31 5 μm.

## Extended Data Fig. 2

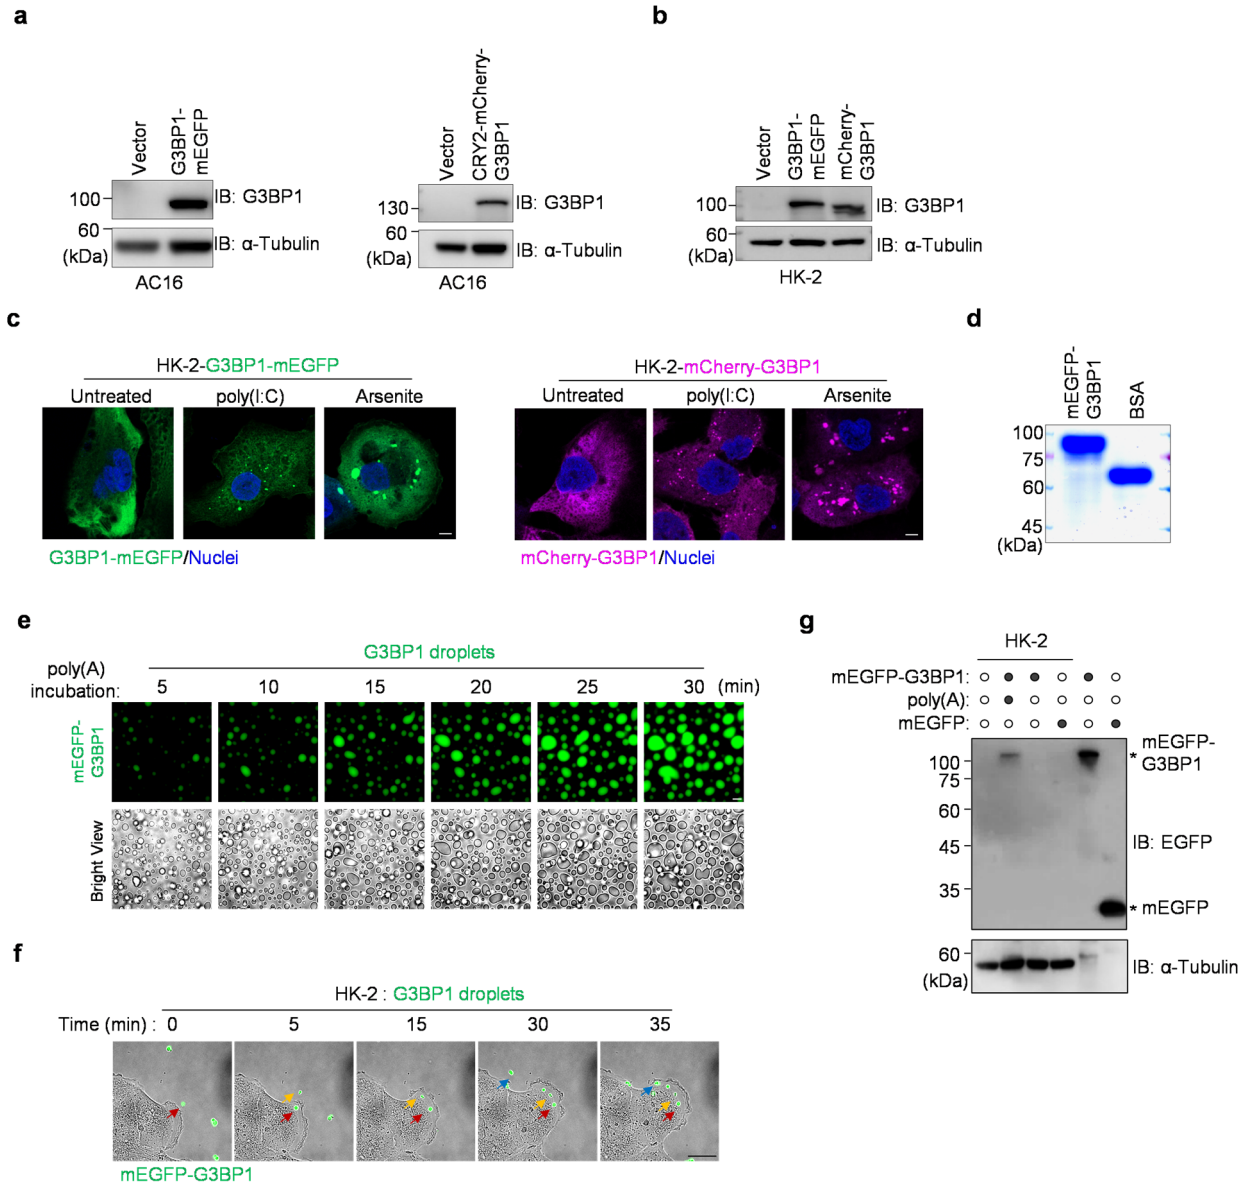

32

33

34

35

36

37

38

39

40

41

42

43

**Extended Data Fig. 2 | Stress granules undergo cell-to-cell transmission. a**, Expression of G3BP1-mEGFP and Cry2-mCherry-G3BP1 in AC16 cells were assessed by immunoblotting. **b**, Expression of G3BP1-mEGFP and mCherry-G3BP1 in HK-2 cells were assessed by immunoblotting. **c**, Representative images showing SG formation in HK-2 cells expressing G3BP1-mEGFP or mCherry-G3BP1 following poly(I:C) or arsenite treatment. **d**, Coomassie blue staining of purified recombinant mEGFP-G3BP1. Bovine serum albumin (BSA), control. **e**, *In vitro* phase separation assay. Recombinant mEGFP-G3BP1 (50  $\mu$ M) was incubated with poly(A) RNA (100 ng  $\mu$ L<sup>-1</sup>) at room temperature, the condensate formation was monitored by time-lapse imaging. **f**, Live-cell imaging of HK-2 cells incubated with *in vitro* reconstituted mEGFP-G3BP1-poly(A) droplets. Images were acquired every 5 min. Scale bar, 25  $\mu$ m. **g**, HK-2 cells were incubated with mEGFP-G3BP1, mEGFP-G3BP1-poly(A) droplets or mEGFP for 6 h, internalized protein was detected by immunoblotting with anti-GFP. Scale bars, 5 (**c**), 10 (**e**) or 25 (**f**)  $\mu$ m. Nuclei, Hoechst.

### Extended Data Fig. 3

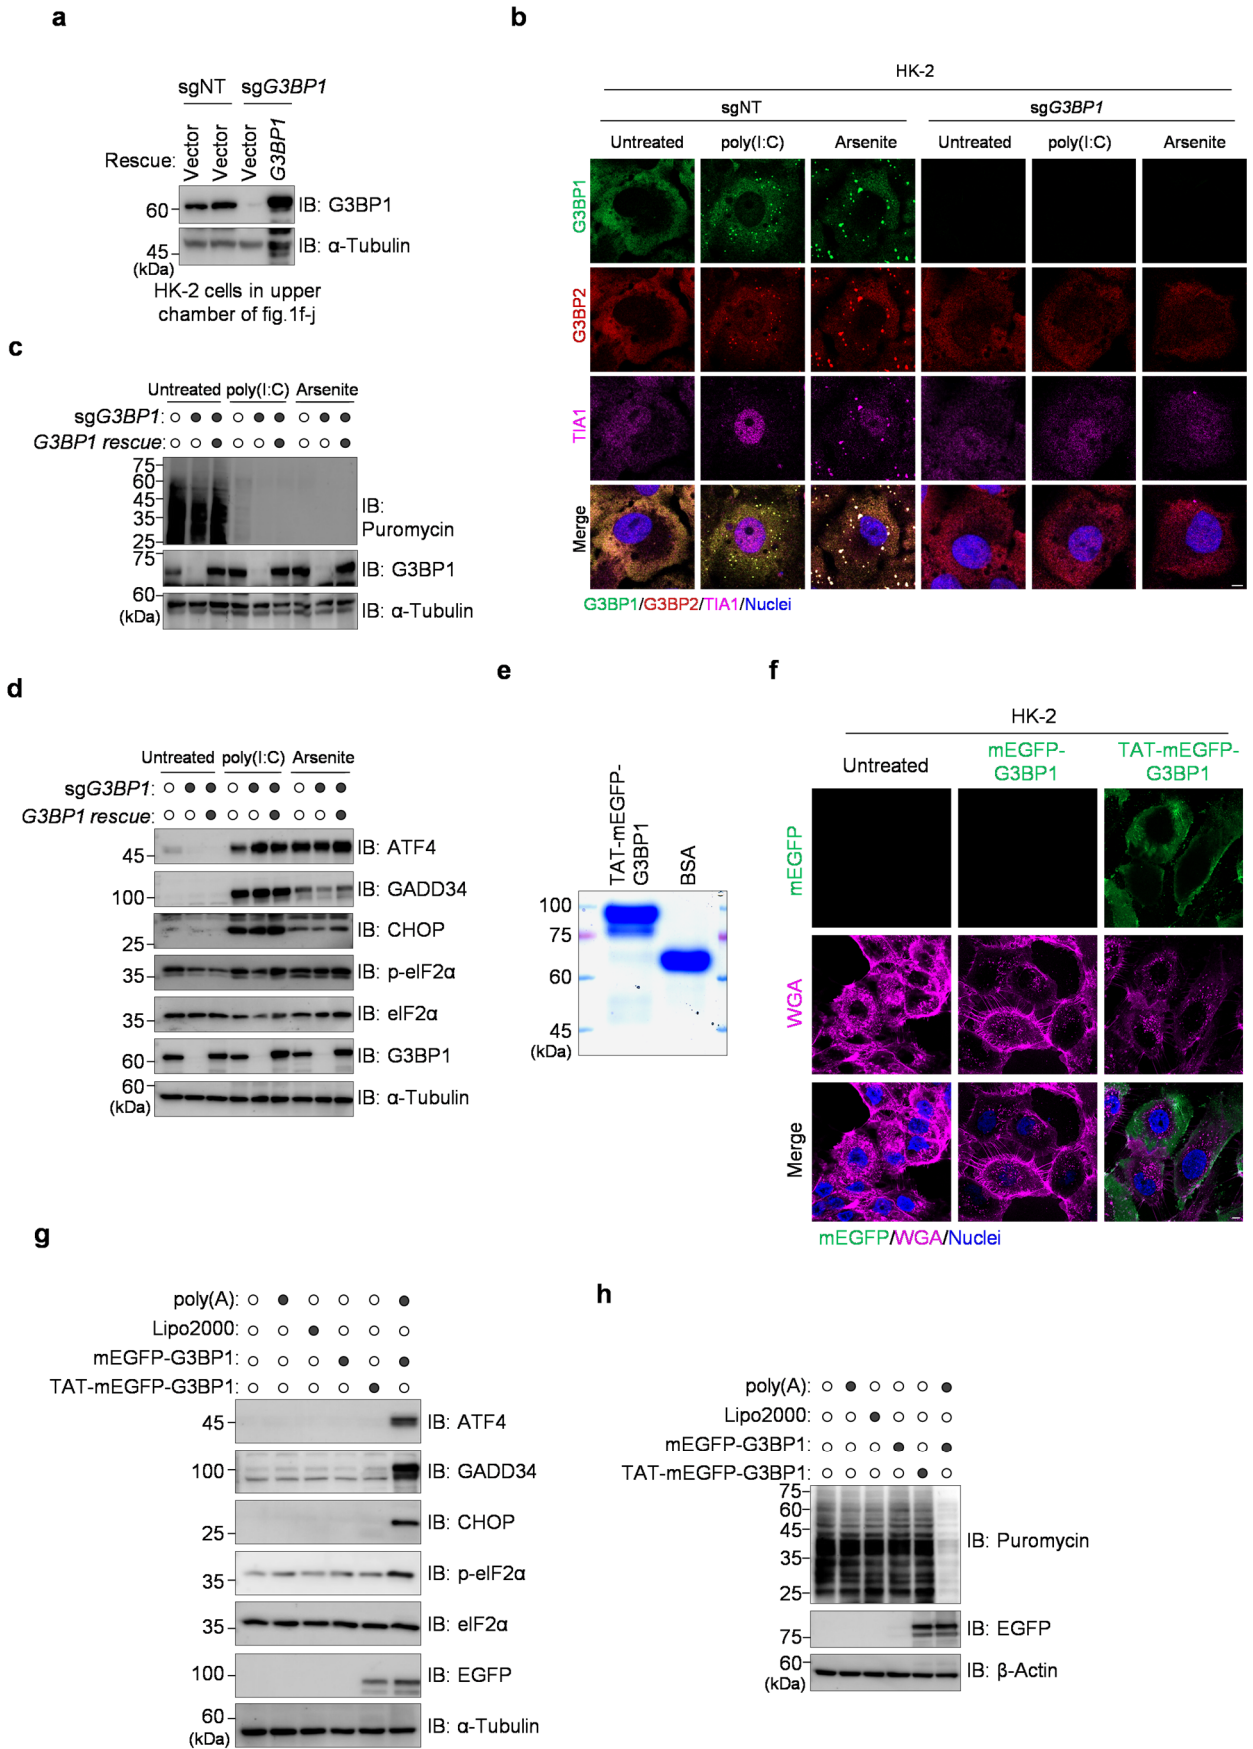

45 **Extended Data Fig. 3 | CTS mediates propagation of the ISR.** **a**, G3BP1 knockout and rescue efficiency  
46 were assessed by immunoblotting. **b**, SGs formation was assessed by immunofluorescence staining in WT and  
47 *G3BP1*-knockout cells. Representative images were shown. **c,d**, Genetically modified HK-2 cells (*sgNT*<sup>vector</sup>  
48 <sup>rescue</sup>, *sgG3BP1*<sup>vector rescue</sup> or *sgG3BP1*<sup>*G3BP1* rescue</sup>) were stimulated with poly(I:C) (1  $\mu\text{g mL}^{-1}$ , 7 h) or arsenite (300  
49  $\mu\text{M}$ , 3 h). Translation (**c**) and ISR activation (**d**) was assessed. **e**, Coomassie blue staining of recombinant TAT-  
50 mEGFP-G3BP1 protein. BSA, control. **f**, HK-2 cells were incubated with mEGFP-G3BP1 or TAT-mEGFP-  
51 G3BP1 for 6 h. Membranes were stained with WGA (magenta). Representative images were shown. **g,h**, HK-2  
52 cells were treated with poly(A), TAT-mEGFP-G3BP1 protein or mEGFP-G3BP1-poly(A) droplets. Translation  
53 efficiency (**g**) and ISR activation (**h**) were assessed as above. Scale bar, 5  $\mu\text{m}$ . Nuclei, Hoechst.



56 **Extended Data Fig. 4 | PERK and GCN2 are important for CTS-induced ISR activation.** **a,b**, Genetically  
57 modified HK-2 cells (sgNT<sup>Vector rescue</sup>, sgPERK<sup>Vector rescue</sup> or sgPERK<sup>PERK rescue</sup>) were stimulated with poly(I:C) (1  
58  $\mu\text{g mL}^{-1}$ , 7 h) or arsenite (300  $\mu\text{M}$ , 3 h). Translation (**a**) and ISR activation (**b**) were assessed. **c,d**, Genetically  
59 modified HK-2 recipient cells (as indicated) were incubated with G3BP1 droplets. Translation (**c**) and ISR  
60 activation (**d**) were assessed. **e-i**, Transwell assay using genetically modified recipient HK-2 cells (as indicated).  
61 Donor HK-2 cells were stressed with poly(I:C) (1  $\mu\text{g mL}^{-1}$ , 5 h) or arsenite (300  $\mu\text{M}$ , 2 h) in the upper chamber,  
62 then transferred to a new lower chamber containing recipients. Schematic drawing was shown (**e**). Translation  
63 (**f,h**) and ISR activation (**g,i**) were analyzed in recipient lysates. **j**, Representative images showing the  
64 colocalization of internalized G3BP1 droplets with endogenous PERK after 24 h incubation, immunostaining  
65 with anti-PERK. Scale bar, 5  $\mu\text{m}$ . G3BP1 droplets, mEGFP-G3BP1:poly(A).

**Extended Data Fig. 5**

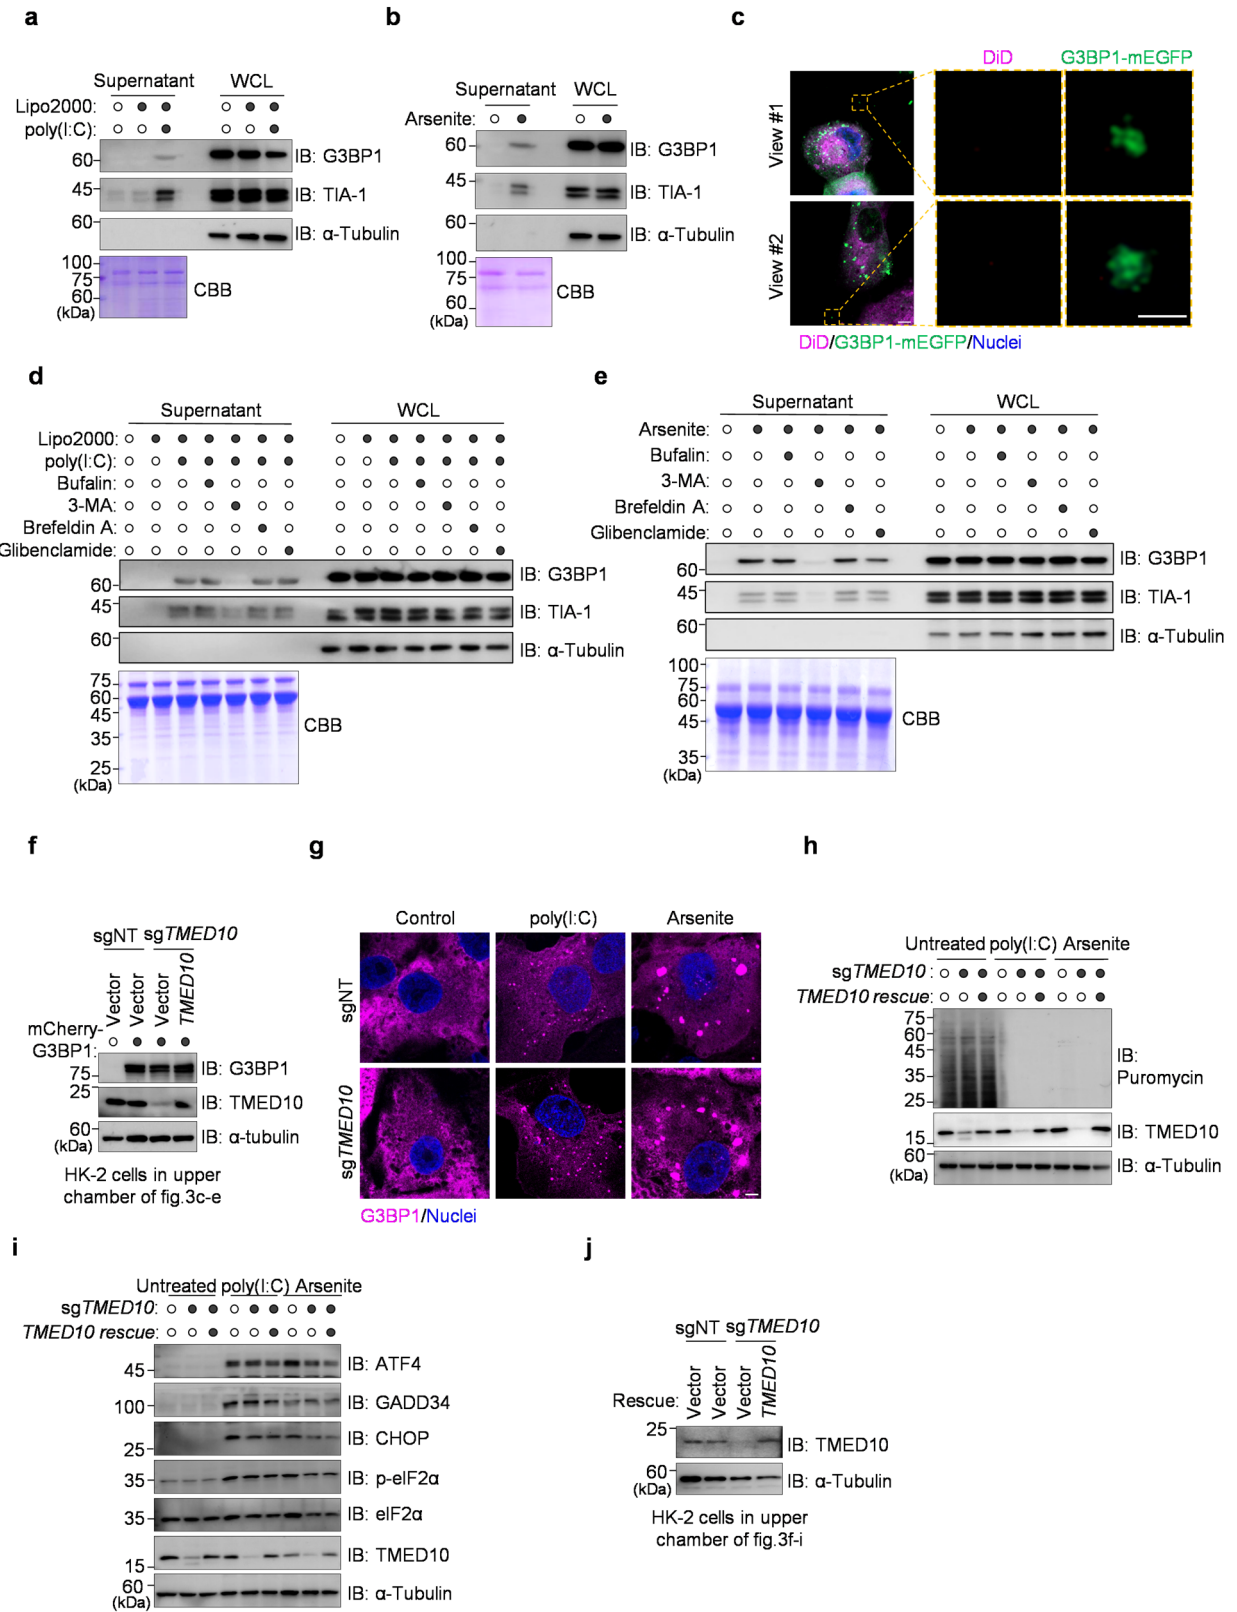

66

67

68

69 **Extended Data Fig. 5 | TMED10-dependent type III UPS mediates SG release for ISR propagation. a,b,**  
70 HK-2 cells were stimulated with poly(I:C) ( $1 \mu\text{g mL}^{-1}$ , 7 h, **a**) or arsenite ( $300 \mu\text{M}$ , 3 h, **b**). Supernatants were  
71 collected and SGs release was assessed by immunoblotting for G3BP1 and TIA-1. Coomassie blue staining  
72 (CBB) served as a loading control. **c**, HK-2-G3BP1-mEGFP cells were stimulated with arsenite. The plasma  
73 membranes were labeled with DiD. **d,e**, HK-2 cells were pretreated with bufalin ( $1 \mu\text{M}$ ), 3-MA ( $2.5 \text{ mM}$ ), brefeldin  
74 A ( $1 \mu\text{M}$ ) or glibenclamide ( $20 \mu\text{M}$ ), followed by stimulation with poly(I:C) (**d**) or arsenite (**e**) as indicated. SGs  
75 release into supernatants was analysed as in **a,b**. **f**, *TMED10* knockout and rescue efficiency in HK-2 cells  
76 expressing mCherry-G3BP1 was assessed by immunoblotting. **g**, Representative images showing poly(I:C)-  
77 and arsenite-induced SGs in wild-type and *TMED10*-knockout HK-2 cells. **h,i**, Genetically modified HK-2 cells  
78 ( $\text{sgNT}^{\text{Vector rescue}}$ ,  $\text{sgTMED10}^{\text{Vector rescue}}$  or  $\text{sgTMED10}^{\text{TMED10 rescue}}$ ) were stimulated with poly(I:C) ( $1 \mu\text{g mL}^{-1}$ , 7 h)  
79 or arsenite ( $300 \mu\text{M}$ , 2 h). Translation (**h**) and ISR activation (**i**) were assessed. **j**, *TMED10* knockout and rescue  
80 efficiency in HK-2 cells was verified by immunoblotting. Scale bars,  $5 \mu\text{m}$ . Nuclei, Hoechst.

Extended Data Fig. 6

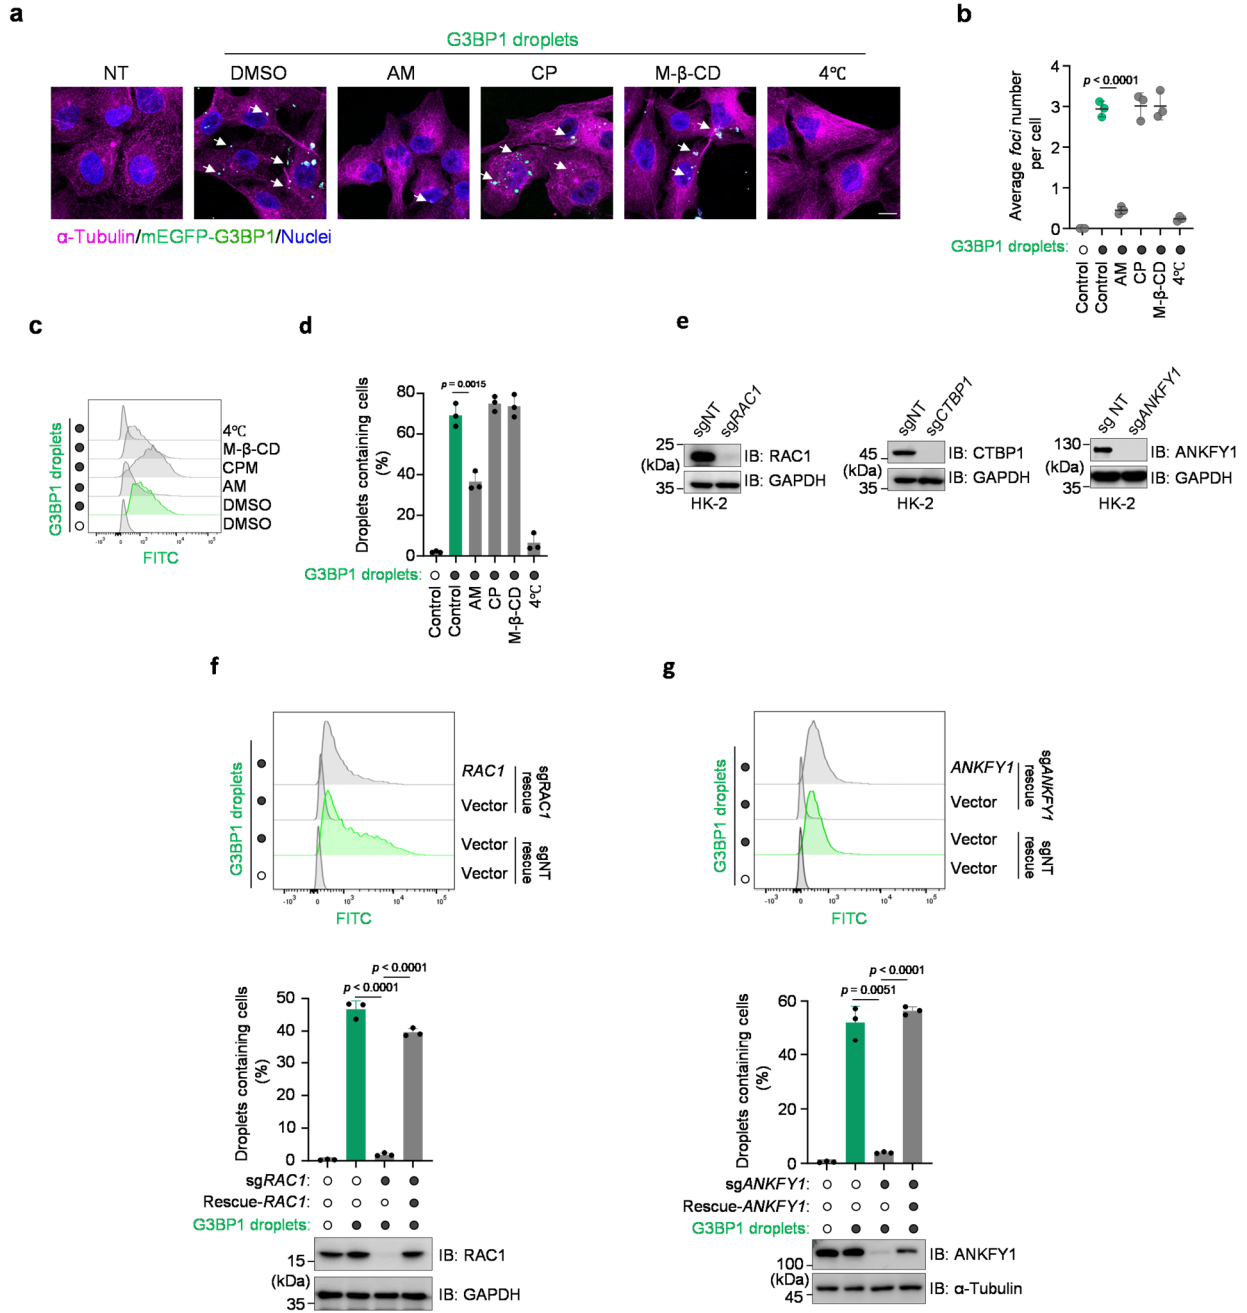

81

82

83

84

85

86

87

88 **Extended Data Fig. 6 | Macropinocytosis mediates SG uptake.** **a–d**, HK-2 cells were pretreated with  
89 amiloride (AM, 20  $\mu$ M), chlorpromazine (CP, 30  $\mu$ M), methyl- $\beta$ -cyclodextrin (M- $\beta$ -CD, 2.5 mM) or 4  $^{\circ}$ C for 1 h,  
90 and then incubated with G3BP1 droplets. Uptake was quantified by immunofluorescence (**a,b**) and flow  
91 cytometry (**c,d**). Representative images were shown (**a**). Average foci number per cell (b) or droplet-containing  
92 cells (**d**) was analyzed. **e**, CRISPR-Cas9-mediated knockout of *CTBP1*, *RAC1* and *ANKFY1* in HK-2 cells was  
93 validated by immunoblotting. **f**, Genetically modified HK-2 cells (sgNT<sup>vector rescue</sup>, sg*RAC1*<sup>vector rescue</sup> or  
94 sg*RAC1*<sup>*RAC1* rescue</sup>) were incubated with condensates for 6 h. Representative images (top) and quantification of  
95 droplet-containing cells (bottom) was shown. **g**, Genetically modified HK-2 cells (sgNT<sup>vector rescue</sup>, sg*ANKFY1*<sup>vector</sup>  
96 <sup>rescue</sup> or sg*ANKFY1*<sup>*ANKFY1* rescue</sup>) were incubated with condensates for 6 h. Uptake was quantified as in **f**. G3BP1  
97 droplets, mEGFP-G3BP1:poly(A). Data are presented as mean  $\pm$  s.d. Statistical significance was determined  
98 by two-tailed unpaired Student's *t*-test. n = 3 biological replicates.

**Extended Data Fig. 7**

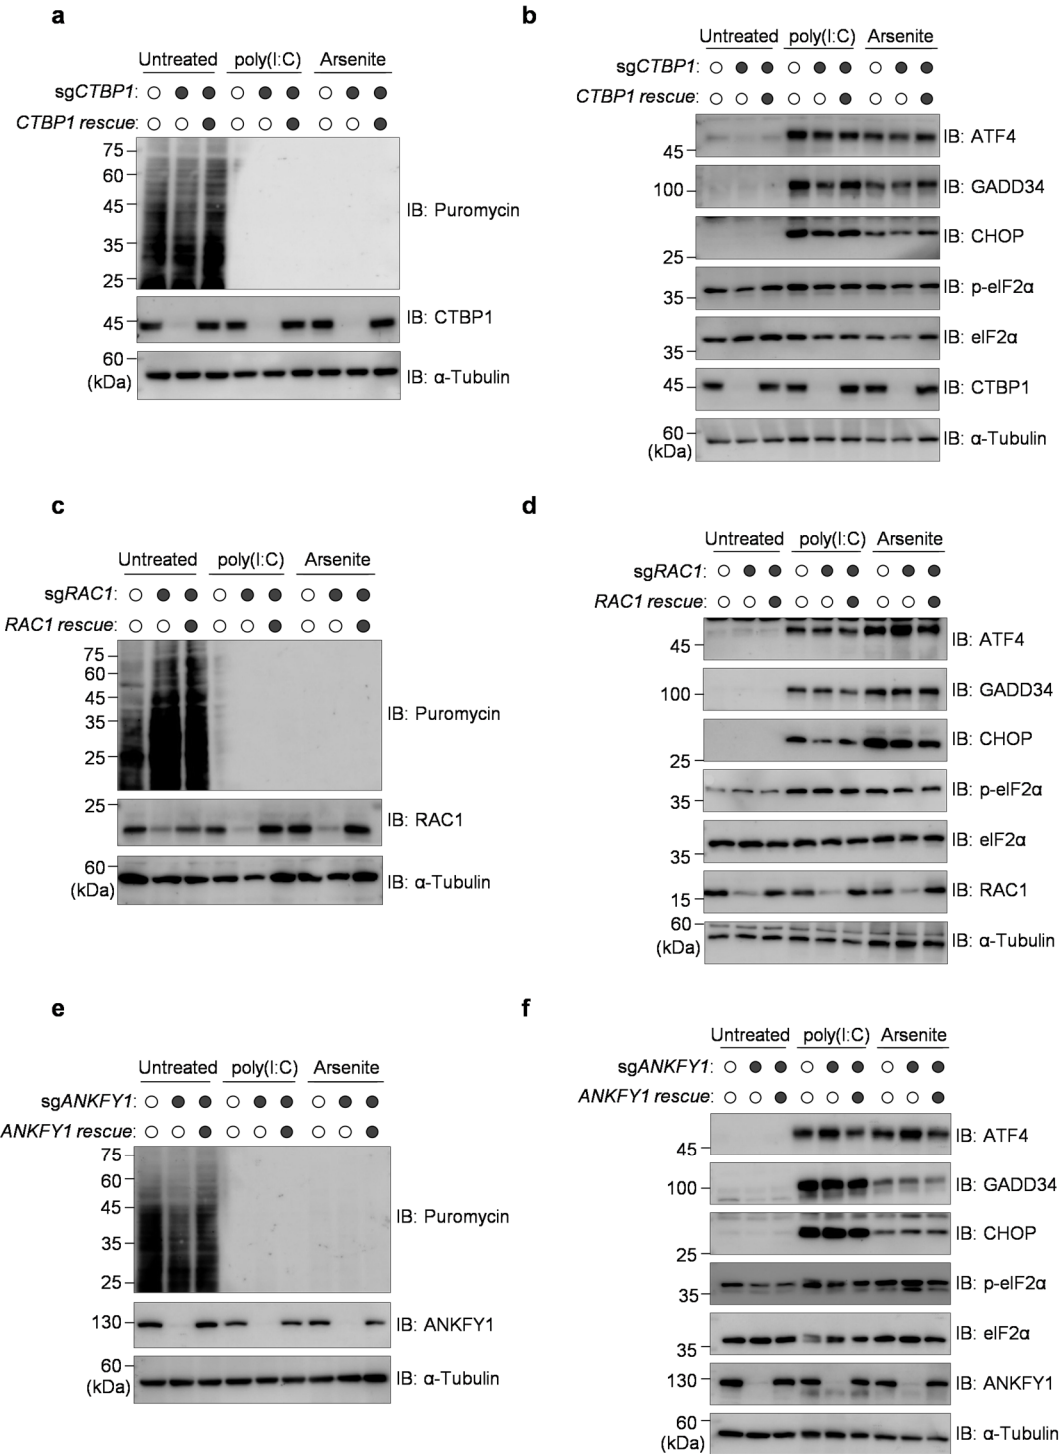

99

100

101

102

103

104 **Extended Data Fig. 7 | Disruption of macropinocytosis did not affect cell-autonomous ISR activation.**  
105 **a,b**, Genetically modified HK-2 cells (sgNT<sup>Vector rescue</sup>, sgCTBP1<sup>Vector rescue</sup> or sg CTBP1<sup>CTBP1 rescue</sup>) were stimulated  
106 with poly(I:C) (1  $\mu\text{g mL}^{-1}$ , 7 h) or arsenite (300  $\mu\text{M}$ , 2 h). Translation (**a**) and ISR activation (**b**) were assessed.  
107 **c,d**, The experiment was performed as in **a,b**, using genetically modified HK-2 cells (sgNT<sup>Vector rescue</sup>,  
108 sgRAC1<sup>Vector rescue</sup> or sgRAC1<sup>RAC1 rescue</sup>) stimulated with poly(I:C) or arsenite. Translation (**c**) and ISR activation  
109 (**d**) were assessed. **e,f**, Genetically modified HK-2 recipient cells (sgNT<sup>Vector rescue</sup>, sgANKFY1<sup>Vector rescue</sup> or  
110 sgANKFY1<sup>ANKFY1 rescue</sup>) were stimulated with poly(I:C) or arsenite. Translation (**e**) and ISR activation (**f**) were  
111 assessed.

**Extended Data Fig. 8**

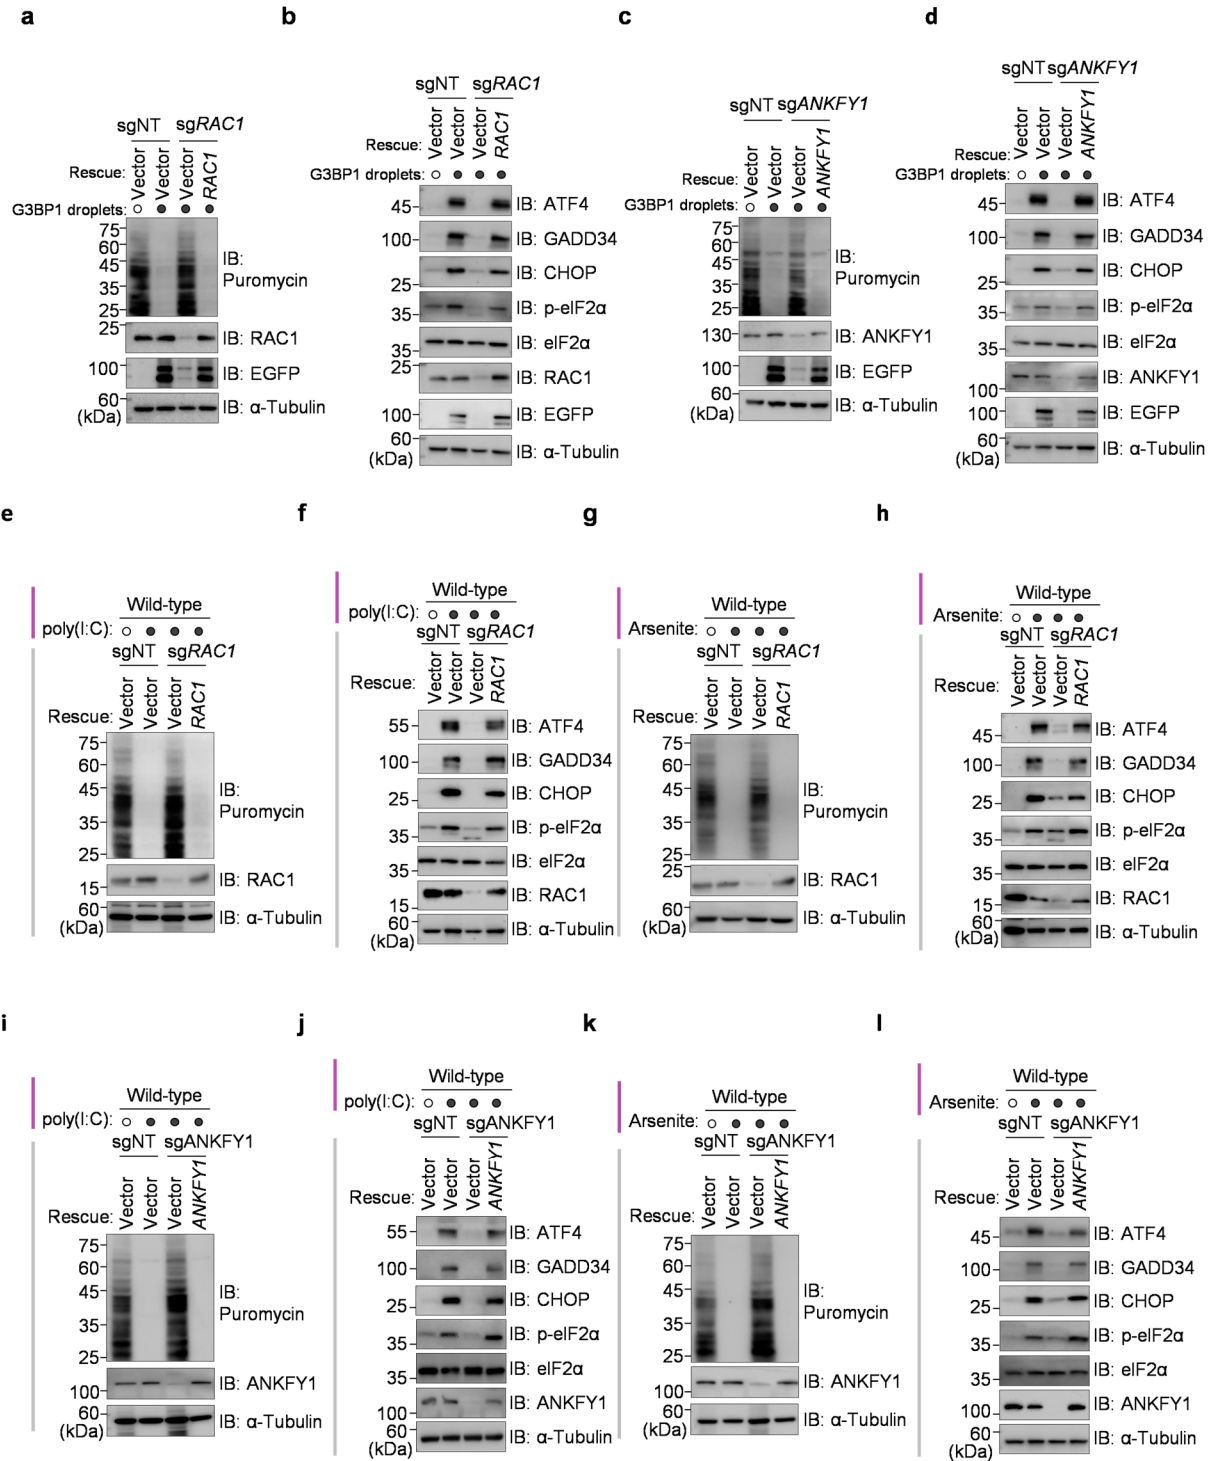

112

113

114

115

116

117 **Extended Data Fig. 8 | Macropinocytosis mediates SG uptake and CTS-driven ISR activation. a,b,**  
118 Genetically modified HK-2 recipient cells (sgNT<sup>Vector rescue</sup>, sgRAC1<sup>Vector rescue</sup> or sgRAC1<sup>RAC1 rescue</sup>) were incubated  
119 with G3BP1 droplets. Translation (a) and ISR activation (b) were assessed. c,d, The experiment was performed  
120 as in a,b, using genetically modified HK-2 cells (sgNT<sup>Vector rescue</sup>, sgANKFY1<sup>Vector rescue</sup> or sgANKFY1<sup>ANKFY1 rescue</sup>).  
121 Translation (c) and ISR activation (d) were assessed. e-h, Transwell assay using WT HK-2 donors and  
122 genetically modified recipients (sgNT<sup>Vector rescue</sup>, sgRAC1<sup>Vector rescue</sup> or sgRAC1<sup>RAC1 rescue</sup>). Donors were stressed  
123 with poly(I:C) (1 µg mL<sup>-1</sup>, 5 h) or arsenite (300 µM, 2 h) in the absence of recipients, then transferred to a new  
124 lower chamber containing unstimulated recipients. Translation (e,g) and ISR activation (f,h) were analyzed in  
125 recipient lysates. i-l, Transwell assay performed as in e-h using genetically modified recipients (sgNT<sup>Vector rescue</sup>,  
126 sgANKFY1<sup>Vector rescue</sup> or sg ANKFY1<sup>ANKFY1 rescue</sup>). Translation (i,k) and ISR activation (j,l) were analyzed in  
127 recipient lysates. G3BP1 droplets, mEGFP-G3BP1:poly(A).

128

## Extended Data Fig. 9

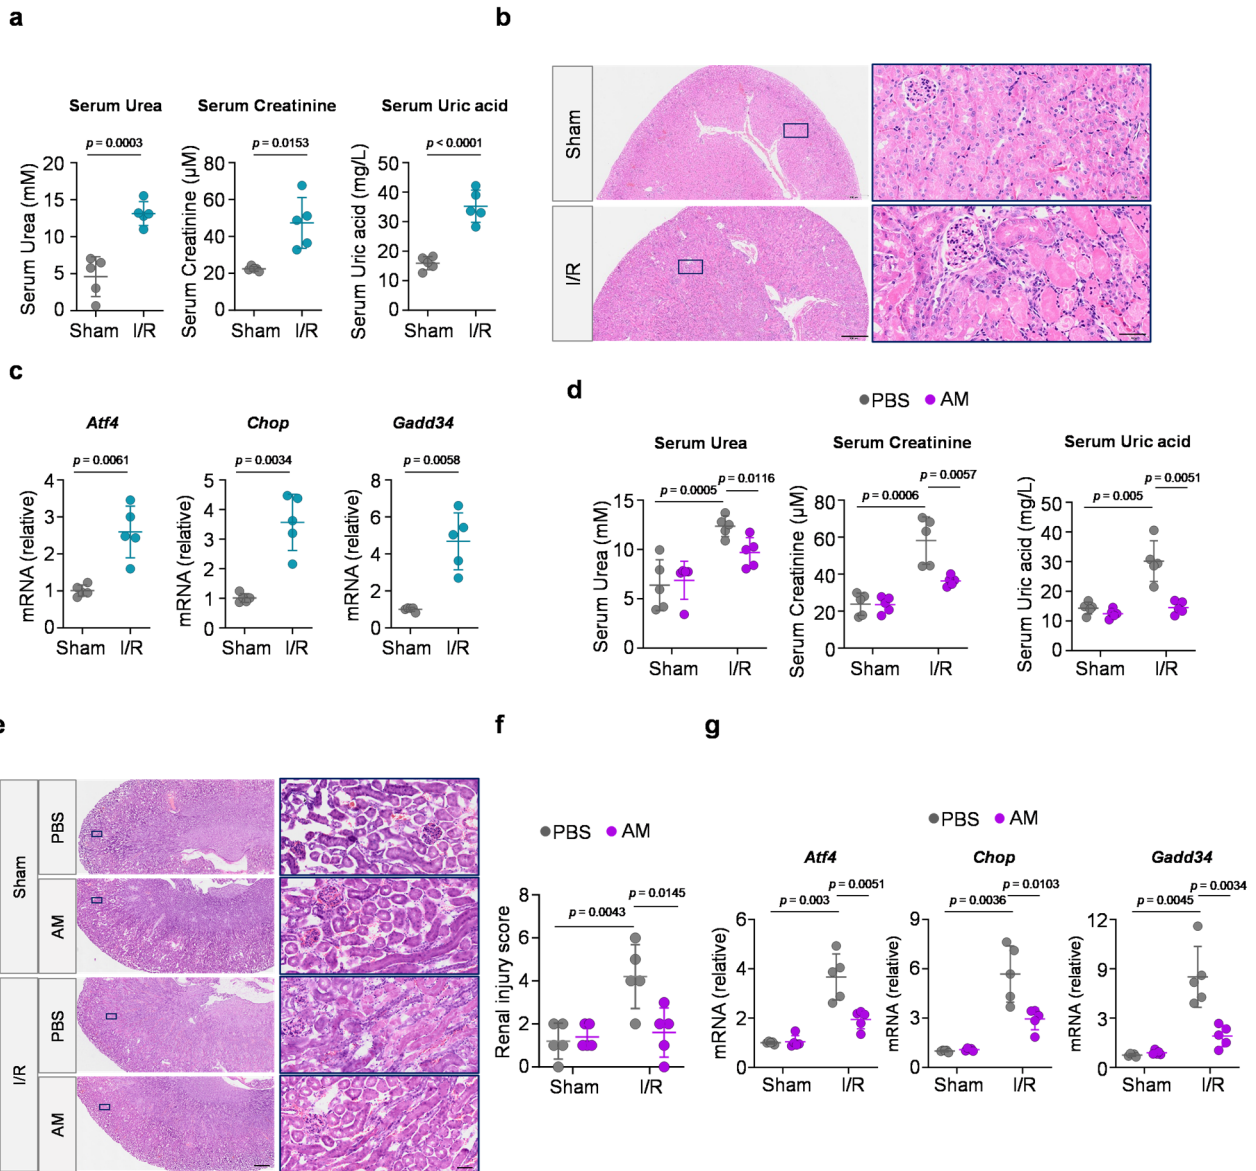

129

130 **Extended Data Fig. 9 | Inhibiting CTS mitigates renal ischemia-reperfusion injury (IRI) by dampening the**  
 131 **ISR. a**, Serum urea, creatinine, and uric acid levels after I/R injury. **b**, Representative images of H&E-stained  
 132 kidney sections from mice subjected to I/R injury. **c**, qPCR analysis of *Atf4*, *Gadd34* and *Chop* expression in the  
 133 kidneys of I/R-treated mice. **d-g**, Amiloride (AM) attenuates I/R-induced kidney injury. Serum urea, creatinine  
 134 and uric acid levels were measured (**d**). Representative H&E-stained kidney sections after sham or I/R as  
 135 indicated (**e**). Renal injury scores were analyzed (**f**). qPCR analysis of ISR-related genes in kidney tissue (**g**)  
 136 was shown. Scale bars, 500 (**b,e**, left) or 50 (**b,e**, right)  $\mu\text{m}$ . Data are mean  $\pm$  s.d.  $n = 5$  biological replicates.  
 137 Statistical significance was determined by two-tailed unpaired Student's *t*-test.
